## Time-series plasma cell-free DNA analysis reveals disease severity of COVID-19 patients

**Authors:** Xinpeng Chen<sup>1†</sup>, Yu Lin<sup>2†</sup>, Tao Wu<sup>1†</sup>, Jinjin Xu<sup>2†</sup>, Zhichao Ma<sup>1†</sup>, Kun Sun<sup>2,5†</sup>, Hui Li<sup>1†</sup>, Yuxue Luo<sup>2,3†</sup>, Chen Zhang<sup>1</sup>, Fang Chen<sup>2</sup>, Jiao Wang<sup>1</sup>, Tingyu Kuo<sup>2,4</sup>, Xiaojuan Li<sup>1</sup>, Chunyu Geng<sup>2</sup>, Feng Lin<sup>1</sup>, Chaojie Huang<sup>2</sup>, Junjie Hu<sup>1</sup>, Jianhua Yin<sup>2</sup>, Ming Liu<sup>1</sup>, Ye Tao<sup>2</sup>, Jiye Zhang<sup>1</sup>, Rijing Ou<sup>2</sup>, Furong Xiao<sup>1</sup>, Huanming Yang<sup>2,6</sup>, Jian Wang<sup>2,6</sup>, Xun Xu<sup>2,7</sup>, Shengmiao Fu<sup>1\*</sup>, Xin Jin<sup>2,3\*</sup>, Hongyan Jiang<sup>1\*</sup>, Ruoyan Chen<sup>2\*</sup>

### Affiliations:

<sup>1</sup>Hainan General Hospital, Hainan Affiliated Hospital of Hainan Medical University, Hainan Provincial Key Laboratory of Cell and Molecular Genetic Translational Medicine, Haikou 570311, Hainan, China.

<sup>2</sup>BGI-Shenzhen, Shenzhen, 518083, Guangdong, China

<sup>3</sup>School of Medicine, South China University of Technology, Guangzhou 510006, Guangdong, China

<sup>4</sup>BGI Education Center, University of Chinese Academy of Sciences, Shenzhen 518083, Guangdong, China

<sup>5</sup>Shenzhen Bay Laboratory, Shenzhen 518132, Guangdong, China

<sup>6</sup>James D. Watson Institute of Genome Sciences, Hangzhou 310058, China

<sup>7</sup>Guangdong Provincial Key Laboratory of Genome Read and Write, BGI-Shenzhen, Shenzhen, 518120, China

\*Correspondence to: [jinxin@genomics.cn](mailto:jinxin@genomics.cn); [chenruoyan@genomics.cn](mailto:chenruoyan@genomics.cn); [hyjiangus@163.com](mailto:hyjiangus@163.com); [smfu2000@126.com](mailto:smfu2000@126.com).

†These authors contributed equally to this work.

**Abstract:** Clinical symptoms of coronavirus disease 2019 (COVID-19) range from asymptomatic to severe pneumonia and death. Detection of individuals at high risk for critical condition is crucial for control of the disease. Herein, for the first time, we profiled and analyzed plasma cell-free DNA (cfDNA) of mild and severe COVID-19 patients. We found that in comparison between mild and severe COVID-19 patients, Interleukin-37 signaling was one of the most relevant pathways; top significantly altered genes included POTEH, FAM27C, SPATA48, which were mostly expressed in prostate and testis; adrenal glands, small intestines and liver were tissues presenting most differentially expressed genes. Our data thus revealed potential tissue involvement, provided insights into mechanism on COVID-19 progression, and highlighted utility of cfDNA as a noninvasive biomarker for disease severity inspections.

**One Sentence Summary:** CfDNA analysis in COVID-19 patients reveals severity-related tissue damage.

### **Main Text:**

A novel coronavirus, severe acute respiratory syndrome-coronavirus 2 (SARS-CoV-2) emerged at the end of 2019 (1, 2), resulting in outbreak of the coronavirus disease 2019 (COVID-19) across the world and more than 5 million cases were confirmed by May 25, 2020 (3). In a report based on ~72,000 COVID-19 patients from China, 14% were classified as severe, 5% were critical, and the rest 81% were considered mild (4). Clinical progression of COVID-19 varies greatly among individuals (4-8), whereas the real course of the disease is not yet well understood. In fact, the incubation period for COVID-19 ranges from 1 to 14 days; the duration of viral shedding ranges from 8 to 37 days; and time from illness onset to death or discharge mainly range from 15 to 25 days (8,9). In addition, the case-mortality rate was found to be correlated with age, preexisting comorbid conditions such as cardiovascular disease, diabetes, and hypertension; however, reported deaths still contain high numbers of teenagers and cases without comorbidities (4-8). Laboratory records such as low lymphocyte counts, high C-reactive protein or D-dimer levels, and secondary bacterial infections could not provide insights into the actual process of death (10,11). Hence, systematical understanding of clinical course of COVID-19 and classification/prediction of severe cases precisely at early stage are essential for management of the disease.

Cell-free DNA (cfDNA) in plasma comprises short, naturally fragmented molecules that preserve valuable information related to gene expression and nucleosome footprint related to its tissues-of-origin (12-16). Numerous studies reported that cfDNA concentration, size profiles, coverage patterns around promoters are associated with various diseases, making cfDNA an intensively investigated biomarker for clinical use in various fields including oncology, non-invasive prenatal diagnosis, organ transplantation, autoimmune diseases, trauma, myocardial infarction, and diabetes (13-16). Circulating cfDNA mostly originate from died cells through apoptosis, necrosis and netosis (14,17,18). CfDNA is found to be potential drivers and therapeutic targets of COVID-19 suggested novel therapy strategies of the disease (14,18). However, to date, only subtotal concentration of cfDNA in serum from COVID-19 was investigated. Hence, to further explore the clinical value of cfDNA in COVID-19, we conducted systematical analysis of whole genome sequencing (WGS) data on cfDNA from mild and severe cases in time series. We report significantly different signals between mild and severe cases, which indicates potential genes, tissues, and pathways that are involved in disease course and severity, demonstrating high value in patient monitoring. Our functional analysis of cfDNA further shed light on mechanisms of progression of severe COVID-19, and demonstrated cfDNA as a potential noninvasive biomarker for disease severity inspections of COVID-19.

### **Gene set enrichment analysis suggest pathways associated with severity of COVID-19**

Four subjects, including two male COVID-19 patients (one mild in his 30's and one severe in his 60's) and 2 healthy controls (one male in his 30's and one female in her 20's), were recruited in this study (Table S1). For the COVID-19 patients, peripheral blood was collected at various time

points within 29 days of hospitalization; plasma cfDNA was extracted and sequenced to ~12x human haploid genome coverage for each time point (Fig. S1 and Table S2). We investigated gene expression pattern in cfDNA via analyzing the sequencing depth-normalized, relative coverage of the promoters. Gene set enrichment analysis was performed using the relative coverage around promoters of known genes on the two time-course data sets and controls (Fig. 1). Six gene clusters showing significantly different patterns between mild and severe cases were identified (Fig. 1A and Fig. 1C). Notably, the average coverage around gene promoters from cluster 2 and 6 decreased along hospitalization time line for the severe case (suggesting up-regulation of these genes), while such pattern did not exist in mild case (Fig. 1A), indicating that the genes involved in disease course could be different in mild and severe cases.

Pathway analysis was carried out on genes of the above six clusters separately (Fig. 1B). For cluster 1 containing the maximum number of genes among the six clusters, the most enriched pathway is interleukin-37 (IL-37) signaling ( $p = 0.005$ , Table S3), which is involved in suppression of cytokine production and inflammation inhibition (19, 20). Interestingly, this pathway had been reported to have potential therapeutic effect on COVID-19 (21). Cluster 2 shows a clear trend of increased expression in the severe case, especially at the last three time points; significantly enriched pathways in this cluster include cytosolic sulfonation of small molecules ( $p = 0.009$ ) and RUNX1 regulates genes involved in megakaryocyte differentiation and platelet function ( $p = 0.01$ ), which is in accordance with the dropping platelet counts from clinical laboratory records of the severe case (Table 1). Cluster 6, which showed similar trend with cluster 2, involves Ub-specific processing proteases ( $p = 2.8 \times 10^{-9}$ ) and deubiquitination pathways ( $p = 3.3 \times 10^{-9}$ ), which are commonly hijacked by viruses for replication and pathogenesis, and were reported containing druggable targets to treat COVID-19 (22). Other enriched pathways include olfactory signaling pathway ( $p = 0.003$ ), G alpha (s) signaling events ( $p = 0.006$ ), signal regulatory protein family interactions ( $p = 4.5 \times 10^{-7}$ ), and cell-cell communication ( $p = 2.3 \times 10^{-4}$ ), which are expected given inflammatory and immune responses in severe COVID-19.

### **Significantly altered genes and tissue specificity on progression of COVID-19**

To detect differentiated genes and tissues between mild and severe cases, relative coverages around promoters from cfDNA 1) within control group, 2) among 4 time points from mild case, 3) among 4 time points from severe case, 4) between mild and severe cases, 5) between cases and controls, were compared using Mann-Whitney rank-sum tests (Fig. 2). We laid emphasis on differences between mild and severe cases, while not significant either between cases and controls, or within controls. Table 2 lists top 10 genes out of all significantly differentially expressed genes (Fig. 2A and Table S4), and the coverage pattern around the promoters of the top 10 genes were shown in Fig. S2. Strikingly, the top 3 genes, namely POTEH (Prostate, Ovary, Testis-Expressed Protein On Chromosome 22), MGC39584 (Family With Sequence Similarity 27 Member C), and C7orf72 (Spermatogenesis Associated 48) are all highly linked to male gender: POTEH and MGC39584 are specifically expressed in prostate and testis, and C7orf72 is associated to spermatogenesis (23). The significant difference of genes related to male reproductive system are corroborated by previous studies that claimed spermatogonia cells to be targets attacked by SARS-CoV-2 (24,25). Other genes worth noting include SQLE that catalyzes oxidation of squalene, a reported conjugate of therapeutic drugs for COVID-19 (26),

and LAMP3, which is specifically expressed in lung and associated to dendritic cell function and adaptive immunity (27). Additionally, the significantly differentiated expression of SPEG gene which were essential for cardiac function was consistent with clinical laboratory records (Table 1, Table S5, and Table S6) that reported the severe case with atrial fibrillation.

Significantly altered genes that are known to be tissue-specific (N=28) selected (Fig. 2B) and their expressing tissues were analyzed (Fig. 2C). Except for prostate and small intestines that were also significant between cases and controls, tissues that include most percent of significantly differentiated genes between mild and severe cases are adrenal, liver, and whole blood, which were acceptable in consideration of the inflammatory and immune reactions associated with COVID-19. Moreover, tissues significant specifically among data collected at the 4 time points of severe case include heart, muscle, and artery, which can be explained by the clinical records reporting arrhythmia, atrial fibrillation, and general fatigue for the severe case.

### **Microbial and mitochondrial cfDNA**

Besides autosomal cfDNA from cases and controls, infection of microbiomes in plasma and mitochondrial cfDNA concentration were also investigated (Fig. 3). In consistent with the RNA-virus nature of SARS-COV-2, we did not find any viral DNA of SARS-CoV-2 in the cfDNA sequencing data. Total counts of bacteria detected in plasma from COVID-19 patients were lower than that from controls (Fig. 3A), which could be explained by medication of interferons and antibiotics for these patients. Notably a novel virus infected in plasma collected at third and fourth time points of the severe case was human betaherpesvirus 5 (Table S7), which might cause pneumonia, colitis, or encephalitis in immunocompromised people (28).

Overall, mitochondrial cfDNA concentrations of plasma from cases were lower than controls, while the severe case had higher concentration than mild case (Fig. 3B). Notably distribution of mitochondrial concentration for severe case showed clear “S” shape, which was matched with hematocrit and hemoglobin at last four collection time (Table 1), suggesting hypoxia of the patient.

### **Discussion**

Acute progression of COVID-19 makes it vital to discriminate patients at high risk to go through rapid deterioration. Results of this study on cfDNA from patients with COVID-19 revealed signals associated with disease severity. We found that IL-37 signaling pathway and SQLE gene are both altered in COVID-19 patients, which results were consistent with previous reports. We also discovered signals that are in line with clinical records, including differentially expressed genes related to atrial fibrillation and male reproduction system. In addition, we observed changes of mitochondrial cfDNA concentration, which matches with hematocrit and hemoglobin of the patient. Moreover, alterations in Ub-specific processing proteases and deubiquitination pathways, SQLE, LAMP3, and SPEG genes provide clues on drug targets and biomarkers for COVID-19. Considering the relatively small sample size, follow-up analyses with large-scale sample size is required to make solid conclusions. Nevertheless, the preliminary results demonstrate that cfDNA could serve as a valuable analyte for surveillance, medication guidance, and prognosis of COVID-19 patients.

## References and Notes:

1. N. Zhu, D. Zhang, W. Wang, X. Li, B. Yang, J. Song, X. Zhao, B. Huang, W. Shi, R. Lu, P. Niu, F. Zhan, X. Ma, D. Wang, W. Xu, G. Wu, G. F. Gao, W. Tan, China Novel Coronavirus Investigating and Research Team, A Novel Coronavirus From Patients With Pneumonia in China, 2019. *N. Engl. J. Med.* **382**(8), 727-733 (2020).
2. P. Zhou, X. Yang, X. Wang, B. Hu, L. Zhang, W. Zhang, H. Si, Y. Zhu, B. Li, C. Huang, H. Chen, J. Chen, Y. Luo, H. Guo, R. Jiang, M. Liu, Y. Chen, X. Shen, X. Wang, X. Zheng, K. Zhao, Q. Chen, F. Deng, L. Liu, B. Yan, F. Zhan, Y. Wang, G. Xiao, Z. Shi, A Pneumonia Outbreak Associated With a New Coronavirus of Probable Bat Origin. *Nature.* **579**(7798), 270-273 (2020).
3. World Health Organization, Coronavirus disease (COVID-2019) situation reports. <https://www.who.int/emergencies/diseases/novel-coronavirus-2019/situation-reports/> [accessed 25 May 2020].
4. Z. Wu, J. M. McGoogan, Characteristics of and Important Lessons From the Coronavirus Disease 2019 (COVID-19) Outbreak in China: Summary of a Report of 72 314 Cases From the Chinese Center for Disease Control and Prevention. *JAMA.* 10.1001/jama.2020.2648 (2020).
5. S. Richardson, J. S. Hirsch, M. Narasimhan, J. M. Crawford, T. McGinn, K. W. Davidson, the Northwell COVID-19 Research Consortium, D. P. Barnaby, L. B. Becker, J. D. Chelico, S. L. Cohen, J. Cookingham, K. Coppa, M. A. Diefenbach, A. J. Dominello, J. Duer-Hefele, L. Falzon, J. Gitlin, N. Hajizadeh, T. G. Harvin, D. A. Hirschwerk, E. J. Kim, Z. M. Kozel, L. M. Marrast, J. N. Mogavero, G. A. Osorio, M. Qiu, T. P. Zanos, Presenting Characteristics, Comorbidities, and Outcomes Among 5700 Patients Hospitalized With COVID-19 in the New York City Area. *JAMA.* 10.1001/jama.2020.6775 (2020).
6. H. Tian, Y. Liu, Y. Li, C. Wu, B. Chen, M. U. G. Kraemer, B. Li, J. Cai, B. Xu, Q. Yang, B. Wang, P. Yang, Y. Cui, Y. Song, P. Zheng, Q. Wang, O. N. Bjornstad, R. Yang, B. T. Grenfell, O. G. Pybus, C. Dye, An investigation of transmission control measures during the first 50 days of the COVID-19 epidemic in China. *Science.* 10.1126/science.abb6105 (2020).
7. G. Grasselli, A. Zangrillo, A. Zanella, M. Antonelli, L. Cabrini, A. Castelli, D. Cereda, A. Coluccello, G. Foti, R. Fumagalli, G. Iotti, N. Latronico, L. Lorini, S. Merler, G. Natalini, A. Piatti, M. V. Ranieri, A. M. Scandroglio, E. Storti, M. Cecconi, A. Pesenti, COVID-19 Lombardy ICU Network, A. Nailescu, A. Corona, A. Zangrillo, A. Protti, A. Albertin, A. F. Molinari, A. Lombardo, A. Pezzi, A. Benini, A. M. Scandroglio, A. Malara, A. Castelli, A. Coluccello, A. Micucci, A. Pesenti, A. Sala, A. Alborghetti, B. Antonini, C. Capra, C. Troiano, C. Roscitano, D. Radrizzani, D. Chiumello, D. Coppini, D. Guzzon, E. Costantini, E. Malpetti, E. Zoia, E. Catena, E. Agosteo, E. Barbara, E. Beretta, E. Boselli, E. Storti, F. Harizay, F. D. Mura, F. L. Lorini, F. D. Sigurtà, F. Marino, F. Mojoli, F. Rasulo, G. Grasselli, G. Casella, G. D. Filippi, G. Castelli, G. Aldegheri, G. Gallioli, G. Lotti, G. Albano, G. Landoni, G. Marino, G. Vitale, G. B. Perego, G. Evasi, G. Citerio, G. Foti, G. Natalini, G. Merli, I. Sforzini, L. Bianciardi, L. Carnevale, L. Grazioli, L. Cabrini, L. Guatteri, L. Salvi, M. D. Poli, M. Galletti, M. Gemma, M. Ranucci, M. Riccio, M. Borelli, M. Zambon, M. Subert, M. Cecconi, M. G. Mazzoni, M. Raimondi, M. Panigada, M. Belliato, N. Bronzini, N. Latronico, N. Petrucci, N. Belgiorio, P. Tagliabue, P. Cortellazzi,

- P. Gnesin, P. Grosso, P. Gritti, P. Perazzo, P. Severgnini, P. Ruggeri, P. Sebastiano, R. D. Covello, R. Fernandez-Olmos, R. Fumagalli, R. Keim, R. Rona, R. Valsecchi, S. Cattaneo, S. Colombo, S. Cirri, S. Bonazzi, S. Greco, S. Muttini, T. Langer, V. Alaimo, U. Viola, Baseline Characteristics and Outcomes of 1591 Patients Infected With SARS-CoV-2 Admitted to ICUs of the Lombardy Region, Italy. *JAMA*. **323**(16), 1574-1581 (2020).
8. B. E. Young, S. W. X. Ong, S. Kalimuddin, J. G. Low, S. Y. Tan, J. Loh, O. Ng, K. Marimuthu, L. W. Ang, T. M. Mak, S. K. Lau, D. E. Anderson, K. S. Chan, T. Y. Tan, T. Y. Ng, L. Cui, Z. Said, L. Kurupatham, M. I. Chen, M. Chan, S. Vasoo, L. Wang, B. H. Tan, R. T. P. Lin, V. J. M. Lee, Y. Leo, D. C. Lye, Singapore 2019 Novel Coronavirus Outbreak Research Team, Epidemiologic Features and Clinical Course of Patients Infected With SARS-CoV-2 in Singapore. *JAMA*. **323**(15), 1488-1494 (2020).
  9. F. Zhou, T. Yu, R. Du, G. Fan, Y. Liu, Z. Liu, J. Xiang, Y. Wang, B. Song, X. Gu, L. Guan, Y. Wei, H. Li, X. Wu, J. Xu, S. Tu, Y. Zhang, H. Chen, B. Cao, Clinical Course and Risk Factors for Mortality of Adult Inpatients With COVID-19 in Wuhan, China: A Retrospective Cohort Study. *Lancet*. **395**(10229), 1054-1062 (2020).
  10. J. Vincent, F. S. Taccone, Understanding pathways to death in patients with COVID-19. *Lancet. Respir. Med.* 10.1016/S2213-2600(20)30165-X (2020).
  11. J. Phua, L. Weng, L. Ling, M. Egi, C. Lim, J. V. Divatia, B. R. Shrestha, Y. M. Arabi, J. Ng, C. D. Gomersall, M. Nishimura, Y. Koh, B. Du, Asian Critical Care Clinical Trials Group, Intensive care management of coronavirus disease 2019 (COVID-19): challenges and recommendation. *Lancet. Respir. Med.* 10.1016/S2213-2600(20)30161-2 (2020).
  12. P. Ulz, G. G. Thallinger, M. Auer, R. Graf, K. Kashofer, S. W. Jahn, L. Abete, G. Pristauz, E. Petru, J. B. Geigl, E. Heitzer, M. R. Speicher, Inferring expressed genes by whole-genome sequencing of plasma DNA. *Nat. Genet.* **48**(10), 1273-8 (2016).
  13. M. W. Snyder, M. Kircher, A. J. Hill, R. M. Daza, J. Shendure, Cell-free DNA comprises an in vivo nucleosome footprint that informs its tissues-of-origin. *Cell*. **164**, 57-68 (2016).
  14. A. Thierry *et al.*, <https://www.preprints.org/manuscript/202004.0238/v1> (2020).
  15. K. Sun, P. Jiang, K. C. A. Chan, J. Wong, Y. K. Y. Cheng, R. H. S. Liang, W. Chan, E. S. K. Ma, S. L. Chan, S. H. Cheng, R. W. Y. Chan, Y. K. Tong, S. S. M. Ng, R. S. M. Wong, D. S. C. Hui, T. N. Leung, T. Y. Leung, P. B. S. Lai, R. W. K. Chiu, Y. M. D. Lo, Plasma DNA Tissue Mapping by Genome-Wide Methylation Sequencing for Noninvasive Prenatal, Cancer, and Transplantation Assessments. *Proc. Natl. Acad. Sci. U. S. A.* **112**(40), E5503-12 (2015).
  16. K. Sun, P. Jiang, S. H. Cheng, T. H. T. Cheng, J. Wong, V. W. S. Wong, S. S. M. Ng, B. B. Y. Ma, T. Y. Leung, S. L. Chan, T. S. K. Mok, P. B. S. Lai, H. L. Y. Chan, H. Sun, K. C. A. Chan, R. W. K. Chiu, Y. M. D. Lo, Orientation-aware Plasma Cell-Free DNA Fragmentation Analysis in Open Chromatin Regions Informs Tissue of Origin. *Genome. Res.* **29**(3), 418-427 (2019).
  17. B. J. Barnes, J. M. Adrover, A. Baxter-Stoltzfus, A. Borczuk, J. Cools-Lartigue, J. M. Crawford, J. Daßler-Plenker, P. Guerci, C. Huynh, J. S. Knight, M. Loda, M. R. Looney, F. McAllister, R. Rayes, S. Renaud, S. Rousseau, S. Salvatore, R. E. Schwartz, J. D. Spicer, C.

- C. Yost, A. Weber, Y. Zuo, M. Egeblad, Targeting potential drivers of COVID-19: Neutrophil extracellular traps. *J. Exp. Med.* **217**(6), e20200652 (2020).
18. Y. Zuo, S. Yalavarthi, H. Shi, K. Gockman, M. Zuo, J. A. Madison, C. N. Blair, A. Weber, B. J. Barnes, M. Egeblad, R. J. Woods, Y. Kanthi, J. S. Knight, Neutrophil extracellular traps in COVID-19. *JCI. Insight.* 10.1172/jci.insight.138999 (2020).
19. D. Boraschi, D. Lucchesi, S. Hainzl, M. Leitner, E. Maier, D. Mangelberger, G. J. Oostingh, T. Pfaller, C. Pixner, G. Posselt, P. Italiani, M. F. Nold, C. A. Nold-Petry, P. Bufler, C. A. Dinarello, IL-37: a new anti-inflammatory cytokine of the IL-1 family. *Eur. Cytokine Netw.* **22**, 127-47 (2011).
20. X. Yan, B. Xie, G. Wu, J. Hu, D. Wang, X. Cai, J. Li, Interleukin-37: The Effect of Anti-Inflammatory Response in Human Coronary Artery Endothelial Cells. *Mediators. Inflamm.* **2019**, 2650590 (2019).
21. P. Conti, G. Ronconi, A. Caraffa, C. Gallenga, R. Ross, I. Frydas, S. Kritas, Induction of pro-inflammatory cytokines (IL-1 and IL-6) and lung inflammation by COVID-19 anti-inflammatory strategies. *J. Biol. Regul. Homeost. Agents.* **34**(2), 1 (2020).
22. D. E. Gordon, G. M. Jang, M. Bouhaddou, J. Xu, K. Obernier, K. M. White, M. J. O'Meara, V. V. Rezelj, J. Z. Guo, D. L. Swaney, T. A. Tummino, R. Huettenhain, R. M. Kaake, A. L. Richards, B. Tutuncuoglu, H. Foussard, J. Batra, K. Haas, M. Modak, M. Kim, P. Haas, B. J. Polacco, H. Braberg, J. M. Fabius, M. Eckhardt, M. Soucheray, M. J. Bennett, M. Cakir, M. J. McGregor, Q. Li, B. Meyer, F. Roesch, T. Vallet, A. M. Kain, L. Miorin, E. Moreno, Z. Z. C. Naing, Y. Zhou, S. Peng, Y. Shi, Z. Zhang, W. Shen, I. T. Kirby, J. E. Melnyk, J. S. Chorba, K. Lou, S. A. Dai, I. Barrio-Hernandez, D. Memon, C. Hernandez-Armenta, J. Lyu, C. J. P. Mathy, T. Perica, K. B. Pilla, S. J. Ganesan, D. J. Saltzberg, R. Rakesh, X. Liu, S. B. Rosenthal, L. Calviello, S. Venkataramanan, J. Liboy-Lugo, Y. Lin, X. Huang, Y. Liu, S. A. Wankowicz, M. Bohn, M. Safari, F. S. Ugur, C. Koh, N. S. Savar, Q. D. Tran, D. Shengjuler, S. J. Fletcher, M. C. O'Neal, Y. Cai, J. C. J. Chang, D. J. Broadhurst, S. Klippsten, P. P. Sharp, N. A. Wenzell, D. Kuzuoglu, H. Wang, R. Trenker, J. M. Young, D. A. Cavero, J. Hiatt, T. L. Roth, U. Rathore, A. Subramanian, J. Noack, M. Hubert, R. M. Stroud, A. D. Frankel, O. S. Rosenberg, Kliment. A. Verba, D. A. Agard, M. Ott, M. Emerman, N. Jura, M. Zastrow, E. Verdin, A. Ashworth, O. Schwartz, C. d'Enfert, S. Mukherjee, M. Jacobson, H. S. Malik, D. G. Fujimori, T. Ideker, C. S. Craik, S. N. Floor, J. S. Fraser, J. D. Gross, A. Sali, B. L. Roth, D. Ruggero, J. Taunton, T. Kortemme, P. Beltrao, M. Vignuzzi, A. García-Sastre, K. M. Shokat, B. K. Shoichet, N. J. Krogan, A SARS-CoV-2 Protein Interaction Map Reveals Targets for Drug Repurposing. *Nature.* 10.1038/s41586-020-2286-9 (2020).
23. J. Zhang, R. Yan, C. Wu, H. Wang, G. Yang, Y. Zhong, Y. Liu, L. Wan, A. Tang, Spermatogenesis-associated 48 Is Essential for Spermatogenesis in Mice. *Andrologia.* **50**(6), e13027 (2018).
24. Z. Wang, X. Xu, scRNA-seq Profiling of Human Testes Reveals the Presence of the ACE2 Receptor, A Target for SARS-CoV-2 Infection in Spermatogonia, Leydig and Sertoli Cells. *Cells.* 2020, **9**(4), 920 (2020).
25. C. Fan *et al.* <https://www.medrxiv.org/content/10.1101/2020.02.12.20022418v1> (2020).

26. F. Dormont, R. Brusini, C. Cailleau, F. Reynaud, A. Peramo, A. Gendron, J. Mouglin, F. Gaudin, M. Varna, P. Couvreur, Squalene-based multidrug nanoparticles for improved mitigation of uncontrolled inflammation. *Sci. Adv.* eaaz5466 (2020).
27. M. Xiong, D. P. Heruth, L. Zhang, S. Ye, Identification of lung-specific genes by meta-analysis of multiple tissue RNA-seq data. *FEBS. Open. Bio.* **6**(7), 774–781 (2016).
28. G. H. Taylor, Cytomegalovirus, *Am. Fam. Physician.* **67**(3),519-24 (2003).

**Acknowledgments:** This work was supported by China National GeneBank. We sincerely thank the support provided by China National GeneBank. **Funding:** 1.the Hainan Medical University novel coronavirus pneumonia project (XGZX2020002) 2. National natural science foundation of china (81960389) 3. Natural Science Foundation of Guangdong Province, China (2017A030306026) 4 Guangdong Provincial Key Laboratory of Genome Read and Write (2017B030301011) 5 Talent Support Project of Guangdong, China (2017TQ04R858) 6. Distinguished Young Scholar of South China University of China (2017JQ017). **Author contributions:** Ruoyan Chen, Xin Jin, Hongyan Jiang, and Shengmiao Fu had full access to all of the data in the study and take responsibility for the integrity of the data and the accuracy of the data analysis; concept and design: Xin Jin, Xiping Chen, Ruoyan Chen; acquisition, analysis, or interpretation of data: Ruoyan Chen, Yu Lin, Jinjin Xu, Yuxue Luo, Tingyu Kuo, Ye Tao; drafting of the manuscript: Ruoyan Chen, Kun Sun; critical revision of the manuscript for important intellectual content: Xin Jin, Xun Xu, Kun Sun; statistical analysis: Ruoyan Chen, Yu Lin, Jinjin Xu; obtained funding: Xun Xu, Xin Jin, Xiping Chen, Huanming Yang, Jian Wang; administrative, technical, or material support: Tao Wu, Zhichao Ma, Hui Li, Chen Zhang, Jiao Wang, Xiaojuan Li, Feng Lin, Junjie Hu, Ming Liu, Jiye Zhang, Fang Chen, Chunyu Geng, Chaojie Huang, Jianhua Yin, Rijing Ou, Xiaorong Fu; supervision: Xin Jin, Xiping Chen, Hongyan Jiang, Shengmiao Fu. **Competing interests:** Authors declare no competing interests. **Data and materials availability:** The data that support the findings of this study have been deposited into CNSA (CNGB Nucleotide Sequence Archive) of CNGBdb with accession number CNP0001081 (<https://db.cngb.org/cnsa/>).







plasma collected at 4 time points for mild (light blue) and severe (dark blue) cases, and at once for the two cases (green, time for dotted lines are invented only for comparison).

**Table 1. Clinical laboratory records of the mild and severe cases**

| Variable                                  | Unit                | Severe         |                |                 |                 |                 |                 | Mild           |                 |                 |
|-------------------------------------------|---------------------|----------------|----------------|-----------------|-----------------|-----------------|-----------------|----------------|-----------------|-----------------|
|                                           |                     | Hospital Day 1 | Hospital Day 2 | Hospital Day 16 | Hospital Day 19 | Hospital Day 25 | Hospital Day 29 | Hospital Day 1 | Hospital Day 11 | Hospital Day 20 |
| Gender                                    |                     | Male           |                |                 |                 |                 |                 | Male           |                 |                 |
| Temperature                               | °C                  | 36             | 37.5           | 38              | 39              | 38              | 37.6            | 36.5           |                 |                 |
| Breathing rate                            | bpm                 | 30             | 22             | 24              | 19              | 20              | 26              | 20             |                 |                 |
| Blood pressure                            | mmHg                | 179/99         | 125/84         | 104/67          | 98/54           | 163/52-78-86    | 116/68          | 126/88         |                 |                 |
| Blood oxygen saturation                   | %                   | 46.00          | 98.00          | 99.00           | 98.00           | 96.00           | 97.00           | 99.00          |                 |                 |
| White blood cell count                    | 10 <sup>9</sup> /L  | 10.89          | 10.23          | 19.29           | 10.47           | 10.16           | 6.48            | 8.07           |                 |                 |
| Red blood cell count                      | 10 <sup>12</sup> /L | 3.56           |                |                 | 5.49            | 2.92            | 3.98            |                |                 |                 |
| Hematocrit                                |                     |                | 0.34           | 0.221           | 0.333           | 0.267           | 0.375           |                |                 |                 |
| PH                                        |                     | 7.4            | 7.251          | 7.386           | 7.425           | 7.371           | 7.384           | 7.342          |                 |                 |
| partial pressure of oxygen                | mmHg                | 80             | 169            | 98              | 94              | 82              | 66              | 118            |                 |                 |
| partial pressure of carbon dioxide        | mmHg                | 33             | 58.1           | 43.6            | 37.8            | 52.4            | 49.8            | 35.4           |                 |                 |
| C-reactive protein                        | mg/L                | 92.95          |                | 180.6           | 107.4           | 159.4           | 166.5           | 4.57           |                 |                 |
| N-terminal pro b-type Natriuretic Peptide | ng/L                |                | 922            | 354             |                 | 98              | 607             |                |                 |                 |
| Magnesium                                 | mmol/L              |                |                | 1.16            |                 |                 | 0.72            |                |                 |                 |
| D-dimer                                   | ng/ml               |                |                |                 |                 | 8.5             | 16.1            |                |                 |                 |
| Sodium                                    | mmol/L              | 129.3          | 134.7          | 145.9           | 148             | 143             | 142             | 138.3          |                 |                 |
| Potassium                                 | mmol/L              | 3.53           |                | 4.02            | 4.08            | 3.7             | 3.65            | 3.93           |                 |                 |
| Chloride                                  | mmol/L              |                |                | 112.3           |                 |                 |                 |                |                 |                 |
| Creatinine                                | mmol/L              | 54             |                | 139.7           |                 |                 |                 |                |                 |                 |
| Glucose                                   | mmol/L              |                |                | 9.05            |                 | 8.54            | 7.6             |                |                 |                 |
| Urea                                      | mmol/L              |                |                | 29.36           |                 |                 | 1.63            |                |                 |                 |
| Calcium                                   | mmol/L              | 1.86           |                | 2.11            |                 | 1.11            | 1.88            |                |                 |                 |
| Aspartate aminotransferase                | U/L                 |                |                | 22.2            |                 |                 | 58.7            |                |                 |                 |
| Alanine aminotransferase                  | U/L                 |                |                | 9.9             |                 |                 | 54.8            |                |                 |                 |
| Albumin                                   | g/L                 | 28.6           |                | 32.8            | 35.1            |                 | 35.7            | 41.3           |                 |                 |
| Alkaline phosphatase                      | U/L                 |                |                |                 |                 |                 | 42              |                |                 |                 |
| Lactate dehydrogenase                     | U/L                 |                |                |                 |                 |                 | 413             |                |                 |                 |
| Lactic acid                               | mmol/L              |                |                | 2.32            |                 | 1.61            | 1.72            | 2.59           |                 |                 |
| Hemoglobin                                | g/L                 | 113            | 114            | 96              | 108             | 89              | 121             | 141            |                 |                 |
| Platelet count                            | 10 <sup>9</sup> /L  | 164            |                | 264             | 281             | 164             | 106             |                |                 |                 |
| Absolute neutrophil count                 | %                   | 92.00          |                | 92.90           | 89.60           | 82.10           | 88.70           | 61.60          |                 |                 |
| Absolute lymphocyte count                 | %                   | 3.50           |                |                 | 5.80            |                 | 5.90            |                |                 |                 |
| The high-sensitivity cardiac troponin     | µg/L                |                |                | 0.027           |                 |                 | 0.028           |                |                 |                 |
| (1→3)-β-D-Glucan                          | pg/ml               |                |                |                 | 128.2           | 197.1           | 218.3           |                |                 |                 |
| Aspergillus galactomannan                 | µg/L                |                |                |                 |                 | 0.12            | 0.13            |                |                 |                 |

|                            |       |               |               |
|----------------------------|-------|---------------|---------------|
| Interleukin 6              | pg/ml | 81.6          | 410.2         |
| Gastric fluid occult blood |       | Positive (++) | Positive (++) |

**Table 2. Top 10 significantly differentiated expressed genes between mild and severe cases**

| CHR | Position  | Gene     | Aliases of gene                                             | p values              |                       |                        |
|-----|-----------|----------|-------------------------------------------------------------|-----------------------|-----------------------|------------------------|
|     |           |          |                                                             | Control               | Case and control      | Mild and severe        |
| 22  | 15690025  | POTEH    | Prostate, Ovary, Testis-Expressed Protein On Chromosome 22  | 0.17                  | 0.24                  | 2.58x10 <sup>-28</sup> |
| 21  | 9821060   | MGC39584 | Family With Sequence Similarity 27 Member C                 | 0.08                  | 1.00                  | 7.44x10 <sup>-27</sup> |
| 7   | 50096085  | C7orf72  | Spermatogenesis Associated 48                               | 0.11                  | 2.74x10 <sup>-3</sup> | 2.81x10 <sup>-25</sup> |
| 8   | 124999756 | SQLE     | Squalene Epoxidase                                          | 1.00                  | 1.15x10 <sup>-6</sup> | 1.23x10 <sup>-19</sup> |
| 12  | 5043918   | KCNA5    | Potassium Voltage-Gated Channel Subfamily A Member 5        | 0.17                  | 1.00                  | 8.64x10 <sup>-19</sup> |
| 2   | 219473003 | SPEG     | Striated Muscle Enriched Protein Kinase                     | 0.02                  | 0.04                  | 1.87x10 <sup>-18</sup> |
| 16  | 1773227   | EME2     | Essential Meiotic Structure-Specific Endonuclease Subunit 2 | 4.63x10 <sup>-3</sup> | 0.32                  | 7.22x10 <sup>-18</sup> |
| 1   | 118989555 | TBX15    | T-Box Transcription Factor 15                               | 0.19                  | 7.96x10 <sup>-3</sup> | 7.65x10 <sup>-18</sup> |
| 3   | 183162878 | LAMP3    | Lysosomal Associated Membrane Protein 3                     | 0.70                  | 1.96x10 <sup>-3</sup> | 1.23x10 <sup>-17</sup> |
| 17  | 9905366   | RCVRN    | Recoverin                                                   | 0.06                  | 1.63x10 <sup>-6</sup> | 1.83x10 <sup>-17</sup> |

## Supplementary Materials for

### Time-series plasma cell-free DNA analysis reveals disease severity of COVID-19 patients

**Authors:** Xinpeng Chen†, Yu Lin†, Tao Wu†, Jinjin Xu†, Zhichao Ma†, Kun Sun†, Hui Li†, Yuxue Luo†, Chen Zhang, Fang Chen, Jiao Wang, Tingyu Kuo, Xiaojuan Li, Chunyu Geng, Feng Lin, Chaojie Huang, Junjie Hu, Jianhua Yin, Ming Liu, Ye Tao, Jiye Zhang, Rijing Ou, Furong Xiao, Huanming Yang, Jian Wang, Xun Xu, Shengmiao Fu\*, Xin Jin\*, Hongyan Jiang\*, Ruoyan Chen\*

\*Correspondence to: [chenruoyan@genomics.cn](mailto:chenruoyan@genomics.cn); [hyjiangus@163.com](mailto:hyjiangus@163.com); [jinxin@genomics.cn](mailto:jinxin@genomics.cn); [smfu2000@126.com](mailto:smfu2000@126.com).

†These authors contributed equally to this work.

#### **This supplementary file includes:**

Materials and Methods  
Fig. S1 to S3  
Tables S1 to S8  
References

## Materials and Methods

### Data collection

A total of 10 samples were collected from 2 patients with COVID-19 at 4 time points and 2 health controls. Leftover surplus blood was collected from participants who had signed consent forms after clinical diagnosis. Peripheral blood was stored using EDTA anticoagulant-coated tubes. The blood samples pretreatment and DNA extraction were proceeded at a Biosafety Level 2 (BSL-2) laboratory to ensure the appropriate biosafety practices (1). All samples were centrifuged at low speed (3000 rpm) for 10 min at 4°C within six hours after collection. The supernatant was centrifuged at high speed (1,4000 rpm) for 10 min at 4°C. Then the plasma was set at 56°C water bath for 30 minutes. Circulating cfDNA was extracted from 200uL plasma using MagPure Circulating DNA Mini KF Kit (MD5432-02) following the manufacturer's guide. The cfDNA was eluted by 200uL TE buffer for QC and 40uL for the rest. For cfDNA library construction, the extracted cfDNAs were processed to library using MGIEasy Cell-free DNA Library Prep kit (MGI, cat. No.: AA00226).

For upstream data processing, firstly, soapnuke (version 1.5.0) (2) was used for trimming the sequencing adapters from raw reads, and filtering low quality and high ratio N. N rate threshold was set to 0.1, low quality rate was set to 0.5, and low quality threshold, namely the max mismatch number when match the adapter to 2 and the clean data quality system to sanger, was set to 12. Secondly, BWA (version 0.7.17-r1188) (3) was used to map reads against the human reference genome (build hg38). After sorting and removing duplication of the aligned reads, variants were detected by Haplotype caller from GATK (4). The above steps were performed by sention (5), a platform for processing of genomic data that combined alignment, variants calling, and quality recalibration together efficiently.

### Gene set enrichment and pathway analysis

Firstly, for each gene, average sequencing depth within 2kb region around transcription start sites (2kb-TSSs) and 200bp region around TSSs (200bp-TSSs) were calculated respectively by DepthOfCoverage package from GATK (4). The relative coverage around TSS was the above depth normalized by average depth of WGS data from each sample. Secondly, for each gene,  $S_i = D_{\max i} - D_{\min i}$  was calculated, where  $D_{\max i}$  represented the highest depth among group  $i$  within 2kb-TSSs/200bp-TSSs and  $D_{\min i}$  represented the lowest depth among group  $i$  within 2kb-TSSs/200bp-TSSs. Genes with  $S_{\text{controls}} > S_{\text{cases}}$  were filtered, and remained genes were ranked by  $S_{\text{cases}}$ . Gene set enrichment analysis was performed on the top 1% ranked genes by the heatmap package from R version 3.5.1, and clusters of genes were selected from dendrogram output by heatmap package. Pathway analysis was carried out by Reactom (6) on the 6 clusters of genes separately (Table S2). Results based on 2kb-TSS regions were presented in Fig. 1, and results based on 200bp-TSS regions were summarized in Fig. S3.

### Analysis on differentiated genes and tissue specificity

To test difference among different groups, including 1)  $G_{\text{control}}$ : 2 samples from 2 control individuals, 2)  $G_{\text{mild}}$ : 4 samples from 1 mild case at 4 time points, 3)  $G_{\text{severe}}$ : 4 samples from 1 severe case at 4 time points, 4)  $G_{\text{mild,severe}}$ : 4 mild and 4 severe samples, 5)  $G_{\text{case,control}}$ : 2 controls and 8 cases, reads start counts, namely counts of starts of sequencing reads pairs, were calculated within 200bp region around transcription start site (TSS) of each gene. For the 2 samples from 2 control individuals and the 8 samples from 4 cases collected at 4 time points, pairwise Wilcox's Rank-sum tests were carried out by wilcox package from R version 3.5.1, and corresponding  $p$  values, including  $G_{\text{control}} \in \{p_{\text{control1,control2}}\}$ ,  $G_{\text{mild}} \in \{p_{\text{mild1,mild2}}, p_{\text{mild1,mild3}}, p_{\text{mild1,mild4}}, p_{\text{mild2,mild3}}, p_{\text{mild2,mild4}}, p_{\text{mild3,mild4}}\}$ ,  $G_{\text{severe}} \in \{p_{\text{severe1,severe2}}, p_{\text{severe1,severe3}}, p_{\text{severe1,severe4}}, p_{\text{severe2,severe3}}, p_{\text{severe2,severe4}}, p_{\text{severe3,severe4}}\}$ ,  $G_{\text{mild,severe}} \in \{p_{\text{mild1,severe1}}, p_{\text{mild1,severe2}}, p_{\text{mild1,severe3}}, p_{\text{mild1,severe4}}, p_{\text{mild2,severe1}}, p_{\text{mild2,severe2}}, p_{\text{mild2,severe3}}, p_{\text{mild2,severe4}}, p_{\text{mild3,severe1}}, p_{\text{mild3,severe2}}, p_{\text{mild3,severe3}}, p_{\text{mild3,severe4}}, p_{\text{mild4,severe1}}, p_{\text{mild4,severe2}}, p_{\text{mild4,severe3}}, p_{\text{mild4,severe4}}\}$ ,  $G_{\text{case,control}} \in \{p_{\text{control1,mild1}}, p_{\text{control1,mild2}}, p_{\text{control1,mild3}}, p_{\text{control1,mild4}}, p_{\text{control1,severe1}}, p_{\text{control1,severe2}}, p_{\text{control1,severe3}}, p_{\text{control1,severe4}}, p_{\text{control2,mild1}}, p_{\text{control2,mild2}}, p_{\text{control2,mild3}}, p_{\text{control2,mild4}}, p_{\text{control2,severe1}}, p_{\text{control2,severe2}}, p_{\text{control2,severe3}}, p_{\text{control2,severe4}}\}$ , were generated. For each group of  $p$  values above, a combined  $p$  value was calculated using Wilkinson's method (7). Cutoff for selection of significantly differentially expressed genes of each group was set to  $p < \frac{0.05}{\text{Count of genes included for significant tests}}$ , namely,  $p < 1.6 \times 10^{-6}$ .

Tissue specificity was analyzed based on grouped meta  $p$  values above. 23,570 transcripts that are expressed specifically from 28 tissues were selected based on GTEx database (8,9).

### Microbiomes and mitochondrial cfDNA concentration estimation

The sequences remaining after removal of reads identified as human were aligned to microbial genome databases, contains 4153 viral and 2328 bacterial genomes, 208 fungi and 79 parasites genomes, coronavirus 2 (SARS-CoV-2) genome downloaded from NCBI, NC\_045512.2. For identifying a positive microbe, we used the methodological criteria according to (10-12), focused on a). Coverage rate; b). Species level sequencing depth; c). Species level relative abundance and d). Unique mapped reads numbers.

Concentration of mitochondrial cfDNA was calculated as count of cfDNA fragments (sequencing reads pairs) that were uniquely mapped to mitochondrial DNA divided by total count of cfDNA fragments that were uniquely mapped to whole genome (Build hg38).

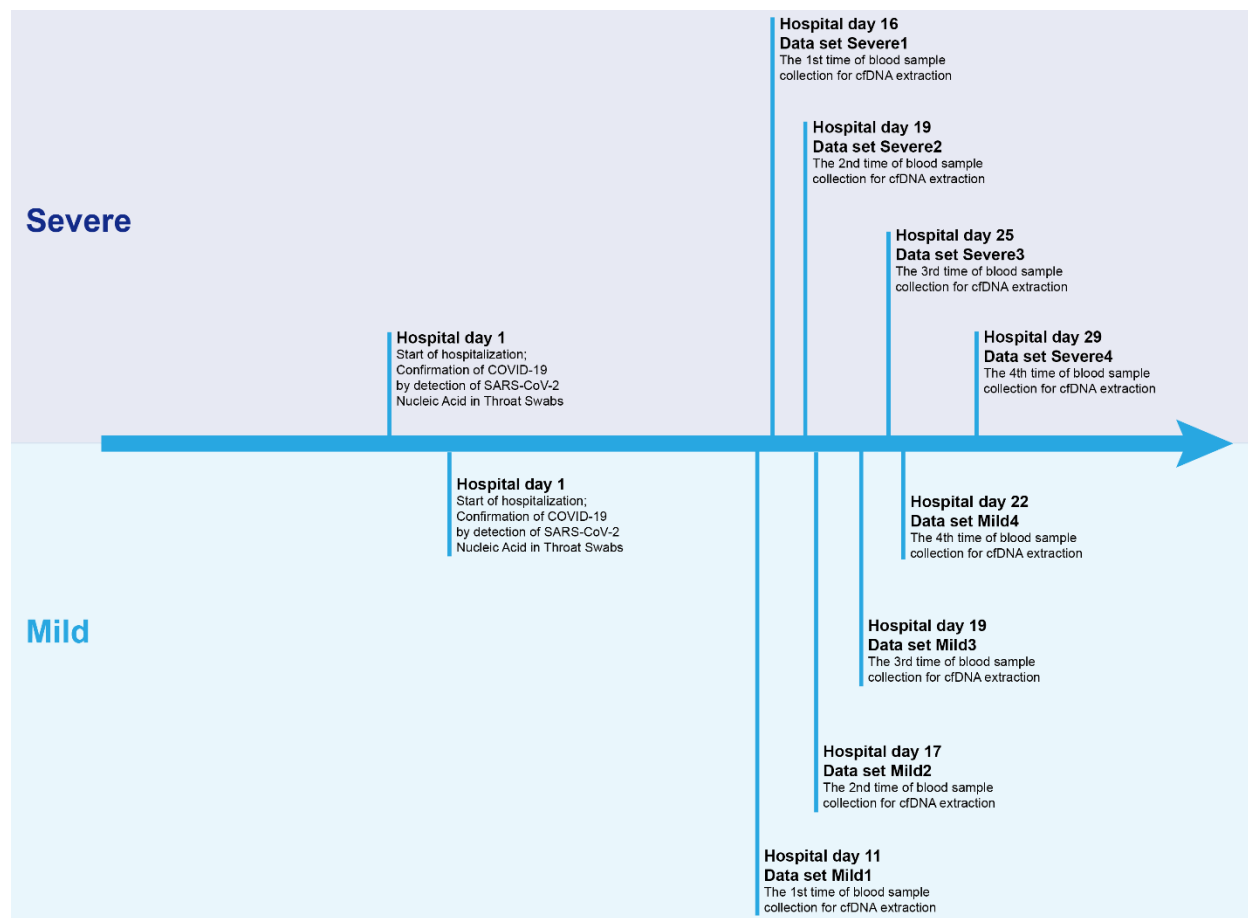

**Fig. S1. Illustration of timelines for the mild and severe cases.**



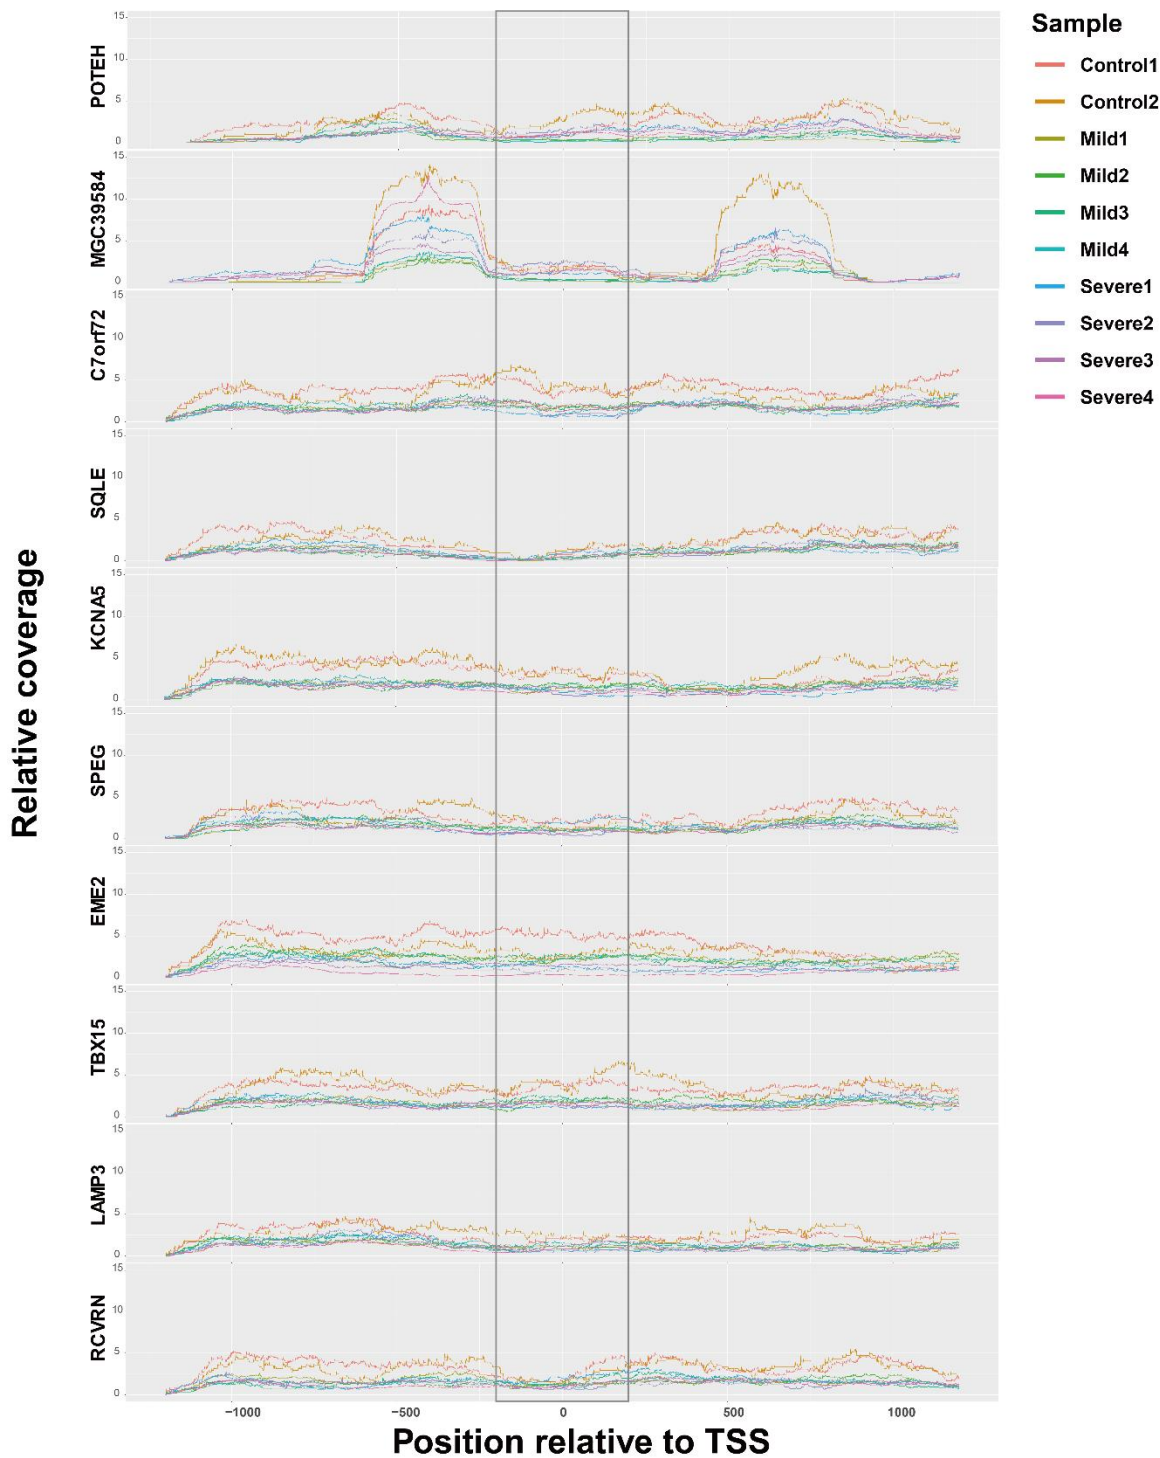

**Fig. S2. Distribution of coverage around TSSs of genes significantly different between severe and mild cases.** Relative coverage was calculated as coverage of cfDNA fragments weighted by average sequencing depth of each sample. Top 10 significant genes were ranked by  $p$  values from top to bottom. Regions within the grey rectangle were used for significant test.

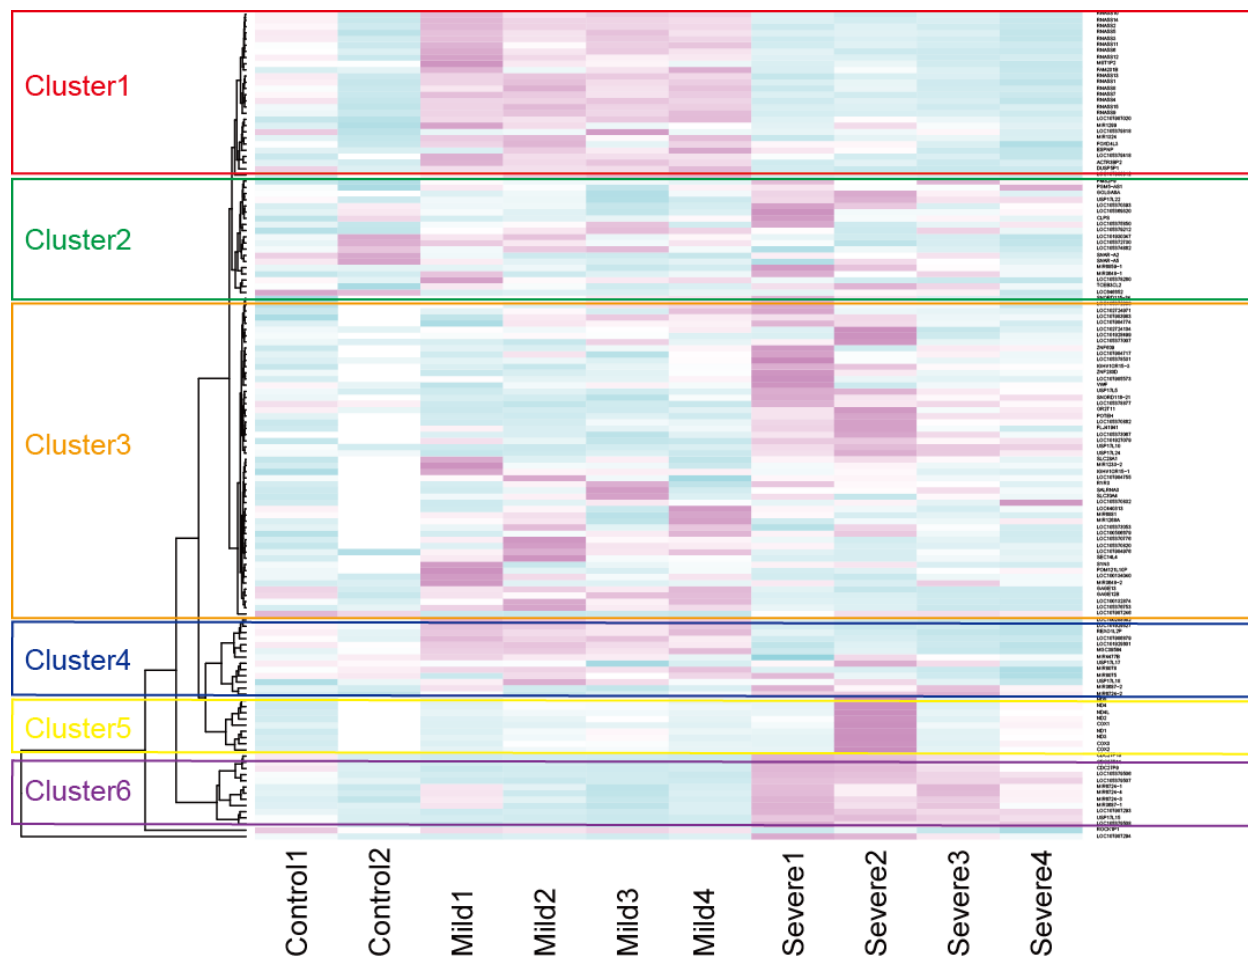

**Fig. S3. Gene set enrichment analysis based on relative coverage around 200bp-TSSs.** Same gene set enrichment analysis as Fig. 1 was performed on 200bp-TSSs regions alternatively, and 6 clusters of genes were used for pathway analysis (Table S8).

**Table S1. Summary on PCR testing of throat swab nucleic acids results.**

| Sample | Testing date | ORF1ab/N Gene Detection <sup>1</sup> |
|--------|--------------|--------------------------------------|
| Severe | 2020/2/3     | Gray area                            |
|        | 2020/2/8     | Negative                             |
|        | 2020/2/11    | Positive                             |
|        | 2020/2/14    | Positive                             |
|        | 2020/2/17    | N Gene Positive                      |
|        | 2020/2/21    | N Gene Positive                      |
|        | 2020/2/25    | Positive                             |
|        | 2020/2/28    | Positive                             |
|        | 2020/3/1     | Positive                             |
|        | 2020/3/2     | Gray area                            |
|        | 2020/3/3     | Negative                             |
|        | 2020/3/4     | Negative                             |
|        | 2020/3/5     | Positive                             |
|        | 2020/3/6     | Negative                             |
|        | 2020/3/7     | Negative                             |
|        | 2020/3/8     | Positive                             |
|        | 2020/3/9     | Positive                             |
|        | 2020/3/10    | Negative                             |
|        | 2020/3/11    | Negative                             |
|        | 2020/3/18    | Gray area                            |
|        | 2020/2/17    | Gray area                            |
|        | 2020/2/19    | Positive                             |
|        | 2020/2/21    | Negative                             |
|        | 2020/2/22    | Positive                             |
|        | 2020/2/24    | Positive                             |
|        | 2020/2/26    | Positive                             |
|        | 2020/2/27    | Negative                             |
|        | 2020/2/28    | Negative                             |
|        | 2020/2/29    | Negative                             |
|        | 2020/3/14    | Negative                             |
|        | Mild         | 2020/3/31                            |

\*1. Negative:Ct $\geq$ 40; Postive:Ct<37;Gray Area :Ct 37-40.

**Table S2. Summary on WGS data of the 2 cases and 2 controls.**

| Sample                     | Control1         | Control2 | Severe1 | Severe2 | Severe3 | Severe4 | Mild1  | Mild2  | Mild3  | Mild4  |
|----------------------------|------------------|----------|---------|---------|---------|---------|--------|--------|--------|--------|
| Sequencing Platform        | DNBSEQ- T1       |          |         |         |         |         |        |        |        |        |
| Sequencing Style           | Paired-end 100bp |          |         |         |         |         |        |        |        |        |
| Gender                     | Male             | Female   |         | Male    |         |         |        | Male   |        |        |
| ESR (%) <sup>1</sup>       | 79.55            | 79.55    | 77.89   | 79.55   | 79.55   | 77.89   | 77.89  | 79.55  | 79.55  | 77.89  |
| GC (%)                     | 40.92            | 40.92    | 40.87   | 40.92   | 40.92   | 40.87   | 40.87  | 40.92  | 40.92  | 40.87  |
| Reads count (x1M)          | 123.68           | 76.90    | 203.77  | 173.04  | 494.18  | 574.49  | 241.41 | 226.70 | 176.81 | 253.74 |
| Bases count (x100M)        | 247.40           | 153.80   | 407.60  | 346.00  | 988.40  | 1149.00 | 482.80 | 453.40 | 353.60 | 507.40 |
| Q10 (% total) <sup>2</sup> | 99.68            | 99.68    | 99.69   | 99.68   | 99.68   | 99.69   | 99.69  | 99.68  | 99.68  | 99.69  |
| Q20 (% total) <sup>2</sup> | 98.43            | 98.43    | 98.41   | 98.43   | 98.43   | 98.41   | 98.41  | 98.43  | 98.43  | 98.41  |
| Q30 (% read1) <sup>2</sup> | 93.76            | 93.76    | 93.58   | 93.76   | 93.76   | 93.58   | 93.58  | 93.76  | 93.76  | 93.58  |
| Q30 (% read2) <sup>2</sup> | 92.21            | 92.21    | 91.95   | 92.21   | 92.21   | 91.95   | 91.95  | 92.21  | 92.21  | 91.95  |
| Q30 (% total) <sup>2</sup> | 92.99            | 92.99    | 92.77   | 92.99   | 92.99   | 92.77   | 92.77  | 92.99  | 92.99  | 92.77  |
| Duplication Rate (%)       | 8.15             | 3.12     | 1.80    | 10.02   | 2.99    | 3.98    | 7.77   | 6.67   | 4.97   | 7.88   |
| Mapping rate               | 99.50            | 99.70    | 99.98   | 99.97   | 99.97   | 99.97   | 99.89  | 99.99  | 99.99  | 99.89  |
| Unique rate                | 93.19            | 93.12    | 92.61   | 92.71   | 92.76   | 92.76   | 92.61  | 92.79  | 92.83  | 92.66  |
| Average depth              | 7.76             | 5.10     | 13.69   | 10.71   | 32.76   | 37.68   | 15.25  | 14.51  | 11.52  | 16.00  |
| Coverage                   | 96.90            | 94.77    | 98.44   | 98.06   | 99.22   | 99.28   | 98.79  | 98.75  | 98.26  | 98.83  |
| Coverage > 4X <sup>3</sup> | 83.73            | 62.74    | 93.19   | 90.41   | 97.95   | 98.20   | 95.63  | 95.29  | 92.02  | 95.92  |
| Coverage > 10X             | 25.70            | 6.75     | 66.46   | 50.73   | 94.61   | 95.61   | 77.48  | 74.20  | 57.48  | 79.05  |
| Coverage > 20X             | 0.66             | 0.19     | 14.86   | 4.27    | 81.46   | 86.14   | 18.55  | 15.48  | 5.52   | 23.09  |

\*1. Estimated sequencing error rate.

2. Q10: percent of bases with sequencing quality above 10; Q20: percent of bases with sequencing quality above 20; Q30: percent of bases with sequencing quality above 30.

3. Coverage of bases with depth equal or above 1, 4, 10, and 20.

**Table S3. Results on pathway analysis of the 6 clusters from coverage around 2kb-TSSs from cfDNA of one mild case, one severe case, and two controls<sup>1</sup>.**

| Cluster                                 | Pathway                                                                                     | Found entities | Total entities | Ratio       | p value     | FDR         | Found reaction | Total reaction | Ratio       |
|-----------------------------------------|---------------------------------------------------------------------------------------------|----------------|----------------|-------------|-------------|-------------|----------------|----------------|-------------|
| Cluster 1                               | <b>Interleukin- signaling</b>                                                               | <b>2</b>       | <b>36</b>      | <b>0.00</b> | <b>0.01</b> | <b>0.17</b> | <b>1</b>       | <b>14</b>      | <b>0.00</b> |
|                                         | <b>Surfactant metabolism</b>                                                                | <b>2</b>       | <b>53</b>      | <b>0.00</b> | <b>0.01</b> | <b>0.17</b> | <b>3</b>       | <b>29</b>      | <b>0.00</b> |
|                                         | Interleukin- family signaling                                                               | 2              | 163            | 0.01        | 0.08        | 0.75        | 1              | 79             | 0.01        |
|                                         | RA biosynthesis pathway                                                                     | 1              | 39             | 0.00        | 0.11        | 0.75        | 1              | 11             | 0.00        |
|                                         | TBC/RABGAPs                                                                                 | 1              | 49             | 0.00        | 0.14        | 0.75        | 1              | 14             | 0.00        |
|                                         | Ion transport by P-type ATPases                                                             | 1              | 71             | 0.01        | 0.19        | 0.75        | 1              | 14             | 0.00        |
|                                         | Signaling by Retinoic Acid                                                                  | 1              | 72             | 0.01        | 0.19        | 0.75        | 1              | 21             | 0.00        |
|                                         | Rab regulation of trafficking                                                               | 1              | 129            | 0.01        | 0.32        | 0.75        | 1              | 35             | 0.00        |
|                                         | Ub-specific processing proteases                                                            | 1              | 206            | 0.01        | 0.46        | 0.75        | 2              | 40             | 0.00        |
|                                         | Ion channel transport                                                                       | 1              | 207            | 0.01        | 0.46        | 0.75        | 1              | 41             | 0.00        |
|                                         | Neddylation                                                                                 | 1              | 241            | 0.02        | 0.51        | 0.75        | 6              | 31             | 0.00        |
|                                         | Signaling by Interleukins                                                                   | 2              | 639            | 0.04        | 0.57        | 0.75        | 1              | 490            | 0.04        |
|                                         | Deubiquitination                                                                            | 1              | 288            | 0.02        | 0.58        | 0.75        | 2              | 77             | 0.01        |
|                                         | Antigen processing: Ubiquitination & Proteasome degradation                                 | 1              | 315            | 0.02        | 0.61        | 0.75        | 4              | 9              | 0.00        |
|                                         | Signaling by Nuclear Receptors                                                              | 1              | 385            | 0.03        | 0.69        | 0.75        | 1              | 191            | 0.02        |
|                                         | Olfactory Signaling Pathway                                                                 | 1              | 432            | 0.03        | 0.73        | 0.75        | 1              | 2              | 0.00        |
|                                         | Class I MHC mediated antigen processing & presentation                                      | 1              | 465            | 0.03        | 0.75        | 0.75        | 4              | 48             | 0.00        |
|                                         | G alpha (s) signalling events                                                               | 1              | 605            | 0.04        | 0.84        | 0.84        | 1              | 18             | 0.00        |
|                                         | Membrane Trafficking                                                                        | 1              | 665            | 0.05        | 0.87        | 0.87        | 1              | 218            | 0.02        |
|                                         | Cytokine Signaling in Immune system                                                         | 2              | 1,261          | 0.09        | 0.90        | 0.90        | 1              | 699            | 0.06        |
|                                         | Vesicle-mediated transport                                                                  | 1              | 824            | 0.06        | 0.92        | 0.92        | 1              | 251            | 0.02        |
|                                         | Metabolism of proteins                                                                      | 4              | 2,354          | 0.16        | 0.93        | 0.93        | 11             | 891            | 0.07        |
|                                         | Transport of small molecules                                                                | 1              | 963            | 0.07        | 0.95        | 0.95        | 1              | 438            | 0.03        |
|                                         | Adaptive Immune System                                                                      | 1              | 999            | 0.07        | 0.95        | 0.95        | 4              | 261            | 0.02        |
|                                         | Post-translational protein modification                                                     | 2              | 1,592          | 0.11        | 0.96        | 0.96        | 8              | 525            | 0.04        |
|                                         | <b>Cytosolic sulfonation of small molecules</b>                                             | <b>2</b>       | <b>72</b>      | <b>0.01</b> | <b>0.01</b> | <b>0.23</b> | <b>5</b>       | <b>24</b>      | <b>0.00</b> |
|                                         | <b>RUNX regulates genes involved in megakaryocyte differentiation and platelet function</b> | <b>2</b>       | <b>78</b>      | <b>0.01</b> | <b>0.01</b> | <b>0.23</b> | <b>2</b>       | <b>33</b>      | <b>0.00</b> |
|                                         | <b>XBP(S) activates chaperone genes</b>                                                     | <b>2</b>       | <b>95</b>      | <b>0.01</b> | <b>0.01</b> | <b>0.23</b> | <b>1</b>       | <b>47</b>      | <b>0.00</b> |
|                                         | IREalpha activates chaperones                                                               | 2              | 101            | 0.01        | 0.02        | 0.23        | 1              | 53             | 0.00        |
|                                         | Unfolded Protein Response (UPR)                                                             | 2              | 155            | 0.01        | 0.04        | 0.34        | 1              | 94             | 0.01        |
| Apoptotic cleavage of cellular proteins | 1                                                                                           | 38             | 0.00           | 0.07        | 0.34        | 1           | 38             | 0.00           |             |
| Cluster 2                               | Effects of PIP hydrolysis                                                                   | 1              | 40             | 0.00        | 0.07        | 0.34        | 1              | 9              | 0.00        |
|                                         | Phase II - Conjugation of compounds                                                         | 2              | 258            | 0.02        | 0.09        | 0.34        | 5              | 72             | 0.01        |
|                                         | Transcriptional regulation by RUNX                                                          | 2              | 261            | 0.02        | 0.09        | 0.34        | 2              | 132            | 0.01        |
|                                         | Inactivation, recovery and regulation of the phototransduction cascade                      | 1              | 54             | 0.00        | 0.10        | 0.34        | 1              | 19             | 0.00        |
|                                         | Apoptotic execution phase                                                                   | 1              | 54             | 0.00        | 0.10        | 0.34        | 1              | 57             | 0.00        |
|                                         | The phototransduction cascade                                                               | 1              | 59             | 0.00        | 0.11        | 0.34        | 1              | 27             | 0.00        |
|                                         | Netrin- signaling                                                                           | 1              | 59             | 0.00        | 0.11        | 0.34        | 1              | 37             | 0.00        |

|           |                                                           |          |              |             |             |             |           |            |             |
|-----------|-----------------------------------------------------------|----------|--------------|-------------|-------------|-------------|-----------|------------|-------------|
|           | G alpha (z) signalling events                             | 1        | 62           | 0.00        | 0.11        | 0.34        | 3         | 13         | 0.00        |
|           | FCGR activation                                           | 1        | 103          | 0.01        | 0.18        | 0.36        | 3         | 6          | 0.00        |
|           | Downstream TCR signaling                                  | 1        | 124          | 0.01        | 0.21        | 0.36        | 4         | 24         | 0.00        |
|           | Role of phospholipids in phagocytosis                     | 1        | 129          | 0.01        | 0.22        | 0.36        | 5         | 12         | 0.00        |
|           | Formation of the cornified envelope                       | 1        | 138          | 0.01        | 0.24        | 0.36        | 6         | 27         | 0.00        |
|           | FCGRA-mediated IL synthesis                               | 1        | 141          | 0.01        | 0.24        | 0.36        | 1         | 20         | 0.00        |
|           | TCR signaling                                             | 1        | 147          | 0.01        | 0.25        | 0.36        | 4         | 52         | 0.00        |
|           | Regulation of actin dynamics for phagocytic cup formation | 1        | 158          | 0.01        | 0.26        | 0.36        | 6         | 24         | 0.00        |
|           | Visual phototransduction                                  | 1        | 169          | 0.01        | 0.28        | 0.36        | 1         | 92         | 0.01        |
|           | Biological oxidations                                     | 2        | 545          | 0.04        | 0.28        | 0.36        | 5         | 188        | 0.02        |
|           | FCERI mediated NF-kB activation                           | 1        | 175          | 0.01        | 0.29        | 0.36        | 13        | 19         | 0.00        |
|           | Apoptosis                                                 | 1        | 189          | 0.01        | 0.31        | 0.36        | 1         | 141        | 0.01        |
|           | Passive transport by Aquaporins                           | 1        | 13           | 0.00        | 0.02        | 0.05        | 2         | 8          | 0.00        |
| Cluster 3 | Aquaporin-mediated transport                              | 1        | 53           | 0.01        | 0.06        | 0.06        | 2         | 25         | 0.00        |
|           | Transport of small molecules                              | 1        | 731          | 0.06        | 0.61        | 0.61        | 2         | 438        | 0.03        |
|           | <b>Olfactory Signaling Pathway</b>                        | <b>3</b> | <b>432</b>   | <b>0.04</b> | <b>0.00</b> | <b>0.01</b> | <b>1</b>  | <b>2</b>   | <b>0.00</b> |
|           | <b>G alpha (s) signalling events</b>                      | <b>3</b> | <b>577</b>   | <b>0.05</b> | <b>0.01</b> | <b>0.01</b> | <b>1</b>  | <b>18</b>  | <b>0.00</b> |
| Cluster 4 | GPCR downstream signalling                                | 3        | 1,154        | 0.10        | 0.04        | 0.04        | 1         | 258        | 0.02        |
|           | Signaling by GPCR                                         | 3        | 1,226        | 0.11        | 0.05        | 0.05        | 1         | 437        | 0.03        |
|           | Signal Transduction                                       | 3        | 2,829        | 0.25        | 0.32        | 0.32        | 1         | 2,347      | 0.19        |
|           | <b>Signal regulatory protein family interactions</b>      | <b>3</b> | <b>16</b>    | <b>0.00</b> | <b>0.00</b> | <b>0.00</b> | <b>10</b> | <b>10</b>  | <b>0.00</b> |
|           | <b>Keratinization</b>                                     | <b>4</b> | <b>217</b>   | <b>0.02</b> | <b>0.00</b> | <b>0.00</b> | <b>1</b>  | <b>34</b>  | <b>0.00</b> |
|           | <b>Cell-Cell communication</b>                            | <b>3</b> | <b>130</b>   | <b>0.01</b> | <b>0.00</b> | <b>0.00</b> | <b>10</b> | <b>60</b>  | <b>0.01</b> |
|           | Developmental Biology                                     | 4        | 1,100        | 0.10        | 0.02        | 0.05        | 1         | 537        | 0.04        |
|           | Cell surface interactions at the vascular wall            | 2        | 246          | 0.02        | 0.02        | 0.07        | 1         | 64         | 0.01        |
|           | DAP interactions                                          | 1        | 47           | 0.00        | 0.04        | 0.09        | 1         | 33         | 0.00        |
| Cluster 5 | Neutrophil degranulation                                  | 2        | 480          | 0.04        | 0.08        | 0.15        | 3         | 10         | 0.00        |
|           | Hemostasis                                                | 2        | 726          | 0.06        | 0.15        | 0.15        | 1         | 328        | 0.03        |
|           | Innate Immune System                                      | 2        | 1,187        | 0.10        | 0.32        | 0.32        | 4         | 697        | 0.06        |
|           | Olfactory Signaling Pathway                               | 1        | 432          | 0.04        | 0.35        | 0.35        | 1         | 2          | 0.00        |
|           | G alpha (s) signalling events                             | 1        | 577          | 0.05        | 0.44        | 0.44        | 1         | 18         | 0.00        |
|           | GPCR downstream signalling                                | 1        | 1,154        | 0.10        | 0.69        | 0.69        | 1         | 258        | 0.02        |
|           | Immune System                                             | 2        | 2,374        | 0.21        | 0.70        | 0.70        | 4         | 1,598      | 0.13        |
|           | Signaling by GPCR                                         | 1        | 1,226        | 0.11        | 0.71        | 0.71        | 1         | 437        | 0.03        |
|           | Signal Transduction                                       | 1        | 2,829        | 0.25        | 0.96        | 0.96        | 1         | 2,347      | 0.19        |
|           | <b>Ub-specific processing proteases</b>                   | <b>8</b> | <b>205</b>   | <b>0.02</b> | <b>0.00</b> | <b>0.00</b> | <b>2</b>  | <b>40</b>  | <b>0.00</b> |
|           | <b>Deubiquitination</b>                                   | <b>8</b> | <b>282</b>   | <b>0.03</b> | <b>0.00</b> | <b>0.00</b> | <b>2</b>  | <b>77</b>  | <b>0.01</b> |
|           | <b>Post-translational protein modification</b>            | <b>8</b> | <b>1,417</b> | <b>0.12</b> | <b>0.00</b> | <b>0.02</b> | <b>2</b>  | <b>525</b> | <b>0.04</b> |
|           | <b>Tyrosine catabolism</b>                                | <b>1</b> | <b>5</b>     | <b>0.00</b> | <b>0.01</b> | <b>0.03</b> | <b>1</b>  | <b>6</b>   | <b>0.00</b> |
| Cluster 6 | Phenylalanine and tyrosine metabolism                     | 1        | 11           | 0.00        | 0.02        | 0.06        | 1         | 12         | 0.00        |
|           | Metabolism of proteins                                    | 8        | 2,012        | 0.18        | 0.03        | 0.06        | 2         | 891        | 0.07        |
|           | GABA receptor activation                                  | 1        | 60           | 0.01        | 0.11        | 0.11        | 2         | 12         | 0.00        |
|           | Signaling by ERBB                                         | 1        | 62           | 0.01        | 0.11        | 0.11        | 1         | 52         | 0.00        |

|                                                                 |   |       |      |      |      |   |       |      |
|-----------------------------------------------------------------|---|-------|------|------|------|---|-------|------|
| Neurotransmitter receptors and postsynaptic signal transmission | 1 | 208   | 0.02 | 0.33 | 0.33 | 2 | 109   | 0.01 |
| Transmission across Chemical Synapses                           | 1 | 273   | 0.02 | 0.41 | 0.41 | 2 | 161   | 0.01 |
| Metabolism of amino acids and derivatives                       | 1 | 376   | 0.03 | 0.52 | 0.52 | 1 | 285   | 0.02 |
| Neuronal System                                                 | 1 | 419   | 0.04 | 0.56 | 0.56 | 2 | 214   | 0.02 |
| Signaling by Receptor Tyrosine Kinases                          | 1 | 523   | 0.05 | 0.64 | 0.64 | 1 | 698   | 0.06 |
| Metabolism                                                      | 1 | 2,142 | 0.19 | 0.99 | 0.99 | 1 | 2,241 | 0.18 |
| Signal Transduction                                             | 1 | 2,829 | 0.25 | 1.00 | 1.00 | 1 | 2,347 | 0.19 |

\*1.Pathway analysis output from Reactom. Pathways with *p* values smaller than 0.01 were marked in bold.

**Table S4. All significantly different genes between mild and severe cases<sup>1</sup>.**

| Chromosome | Position  | Gene         | $-\log_{10}$ (p value of control) | $-\log_{10}$ (p value of case and control) | $-\log_{10}$ (p value of mild and severe) |
|------------|-----------|--------------|-----------------------------------|--------------------------------------------|-------------------------------------------|
| chr22      | 15690025  | POTEH        | 0.76                              | 0.62                                       | 27.59                                     |
| chr21      | 9821060   | MGC39584     | 1.11                              | 0.00                                       | 26.13                                     |
| chr7       | 50096085  | C7orf72      | 0.95                              | 2.56                                       | 24.66                                     |
| chr8       | 124999756 | SQLE         | 0.00                              | 5.94                                       | 18.91                                     |
| chr12      | 5043918   | KCNA5        | 0.76                              | 0.00                                       | 18.06                                     |
| chr2       | 219473003 | SPEG         | 1.61                              | 1.45                                       | 17.73                                     |
| chr16      | 1773227   | EME2         | 2.33                              | 0.49                                       | 17.14                                     |
| chr1       | 118989555 | TBX15        | 0.73                              | 2.10                                       | 17.12                                     |
| chr3       | 183162878 | LAMP3        | 0.15                              | 2.71                                       | 16.91                                     |
| chr17      | 9905366   | RCVRN        | 1.25                              | 5.79                                       | 16.74                                     |
| chr9       | 95086093  | MIR3074      | 0.14                              | 0.00                                       | 16.61                                     |
| chr19      | 40890825  | CYP2G1P      | 1.80                              | 0.00                                       | 16.26                                     |
| chr16      | 1773150   | MRPS34       | 3.54                              | 0.94                                       | 15.79                                     |
| chr5       | 43067022  | LOC100506639 | 0.16                              | 0.00                                       | 15.41                                     |
| chr1       | 84997121  | MCOLN2       | 0.09                              | 0.00                                       | 15.36                                     |
| chr22      | 48274363  | MIR3201      | 0.22                              | 0.79                                       | 15.31                                     |
| chr6       | 138435293 | MIR3145      | 2.25                              | 0.82                                       | 15.05                                     |
| chr19      | 1026274   | CNN2         | 0.16                              | 2.74                                       | 14.74                                     |
| chr22      | 30289626  | GATSL3       | 0.75                              | 0.00                                       | 14.74                                     |
| chr9       | 21239978  | IFNA14       | 2.27                              | 0.92                                       | 14.74                                     |
| chr12      | 15911171  | DERA         | 0.00                              | 0.00                                       | 14.64                                     |
| chr7       | 103347523 | PSMC2        | 0.42                              | 1.17                                       | 14.63                                     |
| chr12      | 7749472   | CLEC4C       | 2.25                              | 5.84                                       | 14.61                                     |
| chr6       | 42746145  | TBCC         | 0.00                              | 1.79                                       | 14.21                                     |
| chr13      | 24825651  | RNF17        | 0.49                              | 0.00                                       | 14.20                                     |
| chr11      | 57335876  | SSRP1        | 1.31                              | 1.54                                       | 13.98                                     |
| chr11      | 79422225  | MIR5579      | 2.47                              | 0.00                                       | 13.86                                     |
| chr16      | 28925210  | RABEP2       | 0.10                              | 0.00                                       | 13.59                                     |
| chr4       | 99511023  | C4orf17      | 0.23                              | 0.09                                       | 13.55                                     |
| chr3       | 10026135  | CIDECP       | 2.67                              | 2.74                                       | 13.47                                     |
| chr21      | 34737181  | LINC00160    | 0.79                              | 0.21                                       | 13.45                                     |
| chr6       | 98834703  | POU3F2       | 0.24                              | 4.43                                       | 13.42                                     |
| chr6       | 35921179  | SRPK1        | 1.65                              | 1.05                                       | 13.42                                     |
| chr13      | 42781549  | FAM216B      | 0.03                              | 1.27                                       | 13.28                                     |
| chr6       | 53262802  | GCM1         | 1.29                              | 1.36                                       | 13.22                                     |
| chr7       | 143959926 | OR2F1        | 1.09                              | 0.83                                       | 13.09                                     |
| chr20      | 63037027  | LINC00029    | 2.70                              | 3.97                                       | 12.83                                     |
| chr5       | 76290530  | SV2C         | 0.52                              | 1.01                                       | 12.73                                     |
| chr3       | 100993507 | ABI3BP       | 0.65                              | 0.84                                       | 12.70                                     |
| chr8       | 99536860  | MIR875       | 0.82                              | 2.10                                       | 12.70                                     |
| chr1       | 9093406   | SLC2A5       | 0.44                              | 0.99                                       | 12.69                                     |
| chr1       | 150765956 | CTSS         | 1.58                              | 0.00                                       | 12.65                                     |
| chr16      | 67150998  | B3GNT9       | 0.87                              | 0.99                                       | 12.55                                     |
| chr12      | 10390053  | KLRK1        | 0.32                              | 1.45                                       | 12.55                                     |
| chr16      | 1782604   | SPSB3        | 4.29                              | 2.96                                       | 12.51                                     |
| chr17      | 49678162  | SPOP         | 0.75                              | 0.00                                       | 12.44                                     |
| chr1       | 2352660   | LOC100129534 | 2.29                              | 0.03                                       | 12.41                                     |
| chr2       | 91775341  | GGT8P        | 1.94                              | 0.17                                       | 12.27                                     |
| chr2       | 55983075  | MIR217       | 0.35                              | 0.00                                       | 12.24                                     |
| chr3       | 52226162  | TLR9         | 2.35                              | 0.65                                       | 12.23                                     |
| chr6       | 73354275  | DPPA5        | 1.02                              | 1.02                                       | 12.19                                     |
| chr16      | 66967474  | CES3         | 0.58                              | 1.27                                       | 12.16                                     |
| chr11      | 75717818  | MOGAT2       | 1.32                              | 2.76                                       | 12.02                                     |
| chr12      | 75390940  | CAPS2        | 0.74                              | 0.00                                       | 12.00                                     |
| chr10      | 31355206  | ZEB1         | 0.63                              | 0.00                                       | 11.93                                     |
| chr19      | 42528508  | CEACAM1      | 0.70                              | 0.00                                       | 11.87                                     |
| chr17      | 63773727  | CCDC47       | 0.00                              | 0.00                                       | 11.85                                     |
| chr3       | 48717277  | IP6K2        | 1.70                              | 1.08                                       | 11.82                                     |
| chr1       | 173866714 | SNORD76      | 0.52                              | 0.79                                       | 11.70                                     |
| chr9       | 102995310 | CYLC2        | 1.41                              | 3.92                                       | 11.65                                     |
| chr16      | 28931938  | CD19         | 1.92                              | 2.51                                       | 11.60                                     |



|       |           |              |      |      |       |
|-------|-----------|--------------|------|------|-------|
| chr1  | 161631962 | FCGR3B       | 0.92 | 2.97 | 11.60 |
| chr9  | 133377948 | SURF4        | 0.88 | 1.06 | 11.36 |
| chr6  | 45197769  | MIR586       | 0.37 | 0.79 | 11.23 |
| chr5  | 67196788  | CD180        | 0.12 | 0.00 | 11.21 |
| chr3  | 112847003 | CD200R1L     | 0.95 | 0.73 | 11.13 |
| chr7  | 99784187  | CYP3A4       | 0.82 | 0.00 | 11.10 |
| chr6  | 7402646   | RIOK1        | 0.00 | 0.00 | 11.08 |
| chr10 | 96304327  | DNTT         | 1.61 | 0.10 | 11.00 |
| chr3  | 46736430  | PRSS46       | 0.36 | 3.08 | 10.98 |
| chr13 | 48580900  | LINC00462    | 1.63 | 0.98 | 10.97 |
| chr5  | 88439089  | LOC102546226 | 0.94 | 0.92 | 10.91 |
| chr10 | 79560460  | SFTPA2       | 0.86 | 0.12 | 10.88 |
| chr3  | 47011541  | NRADDP       | 0.83 | 0.00 | 10.82 |
| chr19 | 44671451  | CEACAM19     | 0.59 | 0.96 | 10.82 |
| chr9  | 122800122 | OR1K1        | 3.25 | 0.97 | 10.81 |
| chr1  | 196774815 | CFHR3        | 2.71 | 1.19 | 10.70 |
| chr16 | 29863287  | CDIPT        | 0.00 | 3.08 | 10.63 |
| chr22 | 39432159  | LOC100506472 | 1.27 | 0.77 | 10.59 |
| chr12 | 48203291  | OR10AD1      | 0.05 | 4.85 | 10.57 |
| chr11 | 35420062  | SLC1A2       | 1.77 | 1.70 | 10.57 |
| chr2  | 240868744 | AGXT         | 0.42 | 0.82 | 10.57 |
| chr14 | 95533628  | SCARNA13     | 0.45 | 2.09 | 10.56 |
| chr10 | 92418660  | MARK2P9      | 0.36 | 1.67 | 10.54 |
| chr6  | 149718255 | LATS1        | 1.96 | 0.14 | 10.44 |
| chr8  | 7355353   | FAM66B       | 2.82 | 0.00 | 10.40 |
| chr3  | 179072278 | ZMAT3        | 2.74 | 0.91 | 10.38 |
| chr16 | 75207173  | CTRB2        | 0.05 | 0.85 | 10.31 |
| chr19 | 48637549  | DBP          | 2.08 | 1.86 | 10.29 |
| chr13 | 21145126  | SAP18        | 1.02 | 1.54 | 10.29 |
| chr5  | 43066970  | LOC100132356 | 0.55 | 0.00 | 10.29 |
| chr5  | 147081519 | PPP2R2B      | 1.66 | 0.39 | 10.27 |
| chr1  | 32362260  | TSSK3        | 0.74 | 0.00 | 10.27 |
| chr5  | 122160175 | LOC100505841 | 1.55 | 0.59 | 10.27 |
| chr5  | 100816564 | MIR548P      | 0.36 | 0.23 | 10.25 |
| chr12 | 19255048  | PLEKHA5      | 0.12 | 0.49 | 10.23 |
| chr1  | 54998943  | BSND         | 0.90 | 0.46 | 10.16 |
| chr4  | 140154078 | MAML3        | 0.19 | 0.00 | 10.12 |
| chr6  | 108751653 | LINC00222    | 0.63 | 0.33 | 10.10 |
| chr9  | 41074624  | PGM5P2       | 3.31 | 0.30 | 10.06 |
| chr1  | 24415532  | STPG1        | 2.26 | 0.98 | 10.05 |
| chr11 | 5857701   | OR52E8       | 1.43 | 1.06 | 10.00 |
| chr19 | 5690334   | RPL36        | 0.30 | 1.02 | 9.98  |
| chr10 | 123154243 | BUB3         | 0.57 | 1.64 | 9.95  |
| chr11 | 121102665 | TECTA        | 0.77 | 2.55 | 9.91  |
| chr19 | 49930203  | ATF5         | 0.19 | 0.00 | 9.89  |
| chr21 | 42113146  | UMODL1       | 0.18 | 1.75 | 9.88  |
| chr5  | 111512596 | STARD4       | 0.97 | 1.19 | 9.87  |
| chr17 | 81125372  | MIR657       | 2.09 | 0.96 | 9.85  |
| chr16 | 3578372   | NLRC3        | 1.28 | 0.00 | 9.85  |
| chr19 | 9786173   | ZNF846       | 0.26 | 1.37 | 9.83  |
| chr20 | 38033467  | TTI1         | 0.68 | 0.00 | 9.82  |
| chr1  | 161118075 | PFDN2        | 1.20 | 0.00 | 9.77  |
| chr5  | 42565863  | GHR          | 1.54 | 0.94 | 9.69  |
| chr1  | 173705429 | ANKRD45      | 0.31 | 0.00 | 9.68  |
| chr17 | 44170705  | ASB16        | 0.84 | 3.33 | 9.66  |
| chr1  | 54802378  | TTC22        | 0.07 | 2.53 | 9.66  |
| chr11 | 56093307  | OR8I2        | 1.14 | 0.00 | 9.65  |
| chr8  | 109540625 | EBAG9        | 0.38 | 0.00 | 9.59  |
| chr19 | 15934865  | CYP4F11      | 0.29 | 0.79 | 9.50  |
| chr6  | 41217946  | TREML3P      | 2.58 | 0.87 | 9.43  |
| chr19 | 43840523  | ZNF283       | 0.06 | 0.00 | 9.42  |
| chr7  | 100969622 | MUC12        | 2.23 | 0.17 | 9.39  |
| chr14 | 88839455  | TTC8         | 1.71 | 0.68 | 9.38  |
| chr2  | 53767791  | CHAC2        | 0.64 | 2.42 | 9.30  |
| chr11 | 128909843 | KCNJ5        | 0.00 | 2.23 | 9.27  |

|       |           |              |      |      |      |
|-------|-----------|--------------|------|------|------|
| chr5  | 135803074 | MIR5692C1    | 0.13 | 0.97 | 9.27 |
| chr2  | 33728216  | MYADML       | 1.15 | 0.97 | 9.25 |
| chr8  | 12134008  | USP17L7      | 2.91 | 1.70 | 9.24 |
| chr14 | 81221230  | GTF2A1       | 0.10 | 0.00 | 9.18 |
| chr9  | 116207520 | PAPPA        | 0.33 | 0.00 | 9.18 |
| chr11 | 60334881  | MS4A6E       | 0.36 | 0.75 | 9.14 |
| chr16 | 10183363  | GRIN2A       | 1.46 | 1.32 | 9.10 |
| chr8  | 30638599  | SMIM18       | 0.86 | 0.00 | 8.93 |
| chr14 | 20891402  | RNASE3       | 3.24 | 2.23 | 8.91 |
| chr8  | 94641135  | ESRP1        | 0.26 | 0.00 | 8.86 |
| chr20 | 47166966  | MIR3616      | 1.33 | 0.00 | 8.86 |
| chr3  | 114316568 | MIR568       | 1.10 | 0.07 | 8.84 |
| chr4  | 77605794  | CXCL13       | 1.54 | 0.00 | 8.79 |
| chr6  | 71420744  | LINC00472    | 1.01 | 0.00 | 8.74 |
| chr11 | 59810871  | MRPL16       | 0.83 | 1.77 | 8.69 |
| chr17 | 49848016  | TAC4         | 0.05 | 0.22 | 8.66 |
| chr3  | 126655123 | TXNRD3       | 1.62 | 0.00 | 8.61 |
| chr2  | 233718791 | UGT1A4       | 1.28 | 0.93 | 8.61 |
| chr10 | 104122294 | SFR1         | 2.67 | 0.16 | 8.60 |
| chr10 | 13234327  | UCMA         | 1.76 | 1.45 | 8.59 |
| chr1  | 205850147 | PM20D1       | 0.17 | 2.68 | 8.58 |
| chr20 | 36541483  | MYL9         | 0.07 | 0.00 | 8.56 |
| chr11 | 112074287 | PIH1D2       | 1.98 | 0.89 | 8.55 |
| chr20 | 12936962  | LOC102606466 | 0.94 | 2.38 | 8.54 |
| chr17 | 58540817  | 4-Sep        | 1.15 | 0.94 | 8.53 |
| chr17 | 56884912  | MTVR2        | 0.04 | 1.02 | 8.51 |
| chr2  | 79120457  | REG1A        | 2.21 | 0.82 | 8.50 |
| chr12 | 121133014 | P2RX7        | 1.24 | 0.94 | 8.50 |
| chr16 | 79600724  | MAF          | 2.10 | 2.64 | 8.48 |
| chr19 | 7763261   | CLEC4M       | 2.00 | 1.94 | 8.47 |
| chr9  | 92424553  | OMD          | 0.00 | 0.97 | 8.43 |
| chr19 | 23914881  | ZNF726       | 0.18 | 0.00 | 8.43 |
| chr11 | 75351830  | ARRB1        | 0.41 | 0.00 | 8.40 |
| chr1  | 92218015  | C1orf146     | 1.13 | 0.81 | 8.40 |
| chr11 | 59514912  | OR4D9        | 0.33 | 0.74 | 8.37 |
| chr1  | 78620943  | IFI44L       | 1.07 | 0.00 | 8.35 |
| chr2  | 219906564 | MIR4268      | 3.06 | 1.42 | 8.34 |
| chr2  | 202961346 | CARF         | 0.34 | 1.30 | 8.33 |
| chr7  | 50319047  | IKZF1        | 0.05 | 0.00 | 8.33 |
| chr2  | 110222939 | LINC00116    | 0.73 | 0.00 | 8.26 |
| chr6  | 38723394  | DNAH8        | 2.10 | 0.86 | 8.26 |
| chr11 | 65018504  | MIR6879      | 0.18 | 0.00 | 8.24 |
| chr12 | 48106307  | SENP1        | 0.07 | 0.00 | 8.24 |
| chr14 | 25050296  | STXBP6       | 0.78 | 1.10 | 8.24 |
| chr8  | 18084997  | ASAH1        | 0.96 | 0.00 | 8.21 |
| chr11 | 85665147  | CREBZF       | 1.13 | 1.03 | 8.21 |
| chr2  | 207625927 | METTL21A     | 0.23 | 0.00 | 8.21 |
| chr22 | 29319617  | RASL10A      | 0.00 | 1.02 | 8.21 |
| chr12 | 29499692  | OVCH1        | 1.46 | 0.00 | 8.18 |
| chr3  | 146606215 | PLSCR5       | 1.79 | 2.97 | 8.17 |
| chr16 | 70529498  | SNORD111B    | 0.83 | 0.13 | 8.17 |
| chr14 | 73851917  | PTGR2        | 0.53 | 2.03 | 8.12 |
| chr7  | 128241277 | LEP          | 2.94 | 0.00 | 8.11 |
| chr19 | 3178737   | S1PR4        | 0.58 | 3.44 | 8.10 |
| chr4  | 119304444 | C4orf3       | 0.33 | 0.82 | 8.04 |
| chr6  | 142147204 | NMBR         | 0.97 | 0.13 | 8.00 |
| chr11 | 90002507  | TRIM53AP     | 0.92 | 2.21 | 8.00 |
| chr9  | 135521437 | LCN1         | 3.09 | 1.14 | 7.93 |
| chr14 | 90455229  | LINC00642    | 3.20 | 0.78 | 7.91 |
| chr7  | 101238819 | CLDN15       | 0.96 | 0.81 | 7.88 |
| chr9  | 72297138  | EQTN         | 0.43 | 0.72 | 7.88 |
| chr10 | 68332957  | PBLD         | 0.06 | 0.00 | 7.88 |
| chr8  | 86069986  | PSKH2        | 0.34 | 0.06 | 7.88 |
| chr2  | 28870308  | TRMT61B      | 1.70 | 1.25 | 7.88 |
| chr1  | 12716114  | AADA3L3      | 1.29 | 0.96 | 7.87 |

|       |           |              |      |      |      |
|-------|-----------|--------------|------|------|------|
| chr5  | 160929410 | ATP10B       | 0.59 | 3.30 | 7.87 |
| chr19 | 15898119  | CYP4F2       | 0.38 | 0.00 | 7.87 |
| chr17 | 73828536  | LINC00469    | 0.48 | 0.09 | 7.87 |
| chr17 | 18644430  | TBC1D28      | 0.93 | 2.36 | 7.87 |
| chr13 | 27969367  | CDX2         | 0.71 | 1.04 | 7.87 |
| chr3  | 184138895 | EIF2B5       | 0.07 | 0.00 | 7.85 |
| chr11 | 110429936 | FDX1         | 0.71 | 0.00 | 7.84 |
| chr11 | 47395639  | SP1          | 1.39 | 0.00 | 7.84 |
| chr10 | 72893555  | OIT3         | 1.40 | 0.75 | 7.83 |
| chr3  | 156817061 | LINC00886    | 0.07 | 1.16 | 7.82 |
| chr9  | 87148643  | C9orf170     | 1.36 | 0.00 | 7.81 |
| chr2  | 232539726 | CHRNA        | 0.25 | 0.84 | 7.81 |
| chr8  | 12129296  | LOC392196    | 2.61 | 0.00 | 7.81 |
| chr5  | 149732824 | MIR378A      | 0.33 | 0.66 | 7.81 |
| chr17 | 43125582  | NBR2         | 1.02 | 0.00 | 7.81 |
| chr11 | 104164298 | PDGFD        | 0.28 | 0.00 | 7.81 |
| chr6  | 42879615  | RPL7L1       | 0.18 | 0.00 | 7.81 |
| chr15 | 74614993  | CLK3         | 0.34 | 1.24 | 7.79 |
| chr17 | 4796143   | PSMB6        | 0.18 | 0.64 | 7.79 |
| chr8  | 104467074 | DPYS         | 2.85 | 0.00 | 7.78 |
| chr2  | 224401993 | FAM124B      | 0.89 | 2.62 | 7.78 |
| chr2  | 239943093 | MIR4786      | 1.73 | 2.56 | 7.78 |
| chr3  | 13570321  | FBLN2        | 3.22 | 2.19 | 7.74 |
| chr7  | 53035655  | POM121L12    | 0.47 | 0.61 | 7.71 |
| chr22 | 20086057  | MIR1306      | 0.12 | 0.00 | 7.69 |
| chr5  | 174751733 | MIR4634      | 1.57 | 1.10 | 7.68 |
| chr17 | 4969770   | MIR6864      | 1.65 | 0.07 | 7.68 |
| chr1  | 149886681 | HIST2H2BE    | 0.07 | 0.00 | 7.67 |
| chr17 | 18315279  | SMCR8        | 1.02 | 0.00 | 7.67 |
| chr15 | 40039201  | SRP14        | 1.94 | 0.00 | 7.67 |
| chr2  | 113072317 | IL1F10       | 1.55 | 0.21 | 7.61 |
| chr3  | 69013960  | EOGT         | 1.10 | 1.08 | 7.57 |
| chr2  | 222656354 | FARSB        | 0.37 | 0.00 | 7.57 |
| chr1  | 113206252 | LOC643441    | 1.78 | 0.10 | 7.57 |
| chr18 | 59899959  | PMAIP1       | 0.30 | 1.19 | 7.57 |
| chr5  | 54075582  | MIR4459      | 1.20 | 0.00 | 7.56 |
| chr1  | 158420865 | OR10K2       | 0.35 | 0.00 | 7.56 |
| chr1  | 206772493 | IL10         | 1.33 | 0.06 | 7.55 |
| chr20 | 38429803  | SNORA71C     | 0.07 | 1.56 | 7.55 |
| chr16 | 19456449  | TMC5         | 1.66 | 0.07 | 7.55 |
| chr10 | 102837532 | CYP17A1      | 1.35 | 1.84 | 7.54 |
| chr7  | 28979966  | LOC100506497 | 1.18 | 0.03 | 7.54 |
| chr9  | 92292592  | SNORA84      | 1.00 | 0.00 | 7.51 |
| chr5  | 39364552  | C9           | 1.91 | 0.34 | 7.47 |
| chr15 | 76062996  | NRG4         | 0.39 | 2.09 | 7.46 |
| chr10 | 88851974  | ANKRD22      | 3.49 | 3.13 | 7.44 |
| chr1  | 15736313  | SLC25A34     | 0.51 | 0.89 | 7.44 |
| chr4  | 139687664 | MGST2        | 1.31 | 2.94 | 7.42 |
| chr21 | 42951013  | MIR5692B     | 0.07 | 0.00 | 7.42 |
| chr2  | 230327192 | SP140L       | 0.70 | 0.00 | 7.42 |
| chr17 | 15682878  | TRIM16       | 0.87 | 0.26 | 7.42 |
| chr8  | 96235633  | UQCRB        | 2.26 | 0.00 | 7.42 |
| chr4  | 5019469   | CYTL1        | 2.22 | 0.07 | 7.41 |
| chr4  | 138130684 | LINC00616    | 0.08 | 0.08 | 7.41 |
| chr10 | 102359272 | GBF1         | 1.20 | 1.30 | 7.40 |
| chr11 | 59443168  | OR5A1        | 1.45 | 0.24 | 7.39 |
| chr5  | 149960736 | SLC26A2      | 0.28 | 0.00 | 7.38 |
| chr8  | 10672636  | C8orf74      | 3.37 | 2.09 | 7.36 |
| chr3  | 109409989 | LINC01205    | 0.19 | 1.02 | 7.35 |
| chr11 | 59713844  | OR10V1       | 2.27 | 0.00 | 7.35 |
| chr20 | 4721853   | PRND         | 3.17 | 0.20 | 7.34 |
| chr19 | 10817495  | MIR199A1     | 1.29 | 0.00 | 7.31 |
| chr17 | 81309247  | LINC00482    | 0.76 | 0.00 | 7.29 |
| chr1  | 3873296   | DFFB         | 0.52 | 0.00 | 7.28 |
| chr15 | 98900610  | IGF1R        | 1.52 | 0.00 | 7.28 |

|       |           |              |      |      |      |
|-------|-----------|--------------|------|------|------|
| chr11 | 66052344  | SF3B2        | 0.25 | 0.00 | 7.28 |
| chr8  | 17276395  | VPS37A       | 1.87 | 0.00 | 7.28 |
| chr7  | 5072059   | RBAKDN       | 0.79 | 0.64 | 7.28 |
| chr6  | 2987966   | LINC01011    | 0.52 | 0.00 | 7.23 |
| chr14 | 101025563 | MIR1197      | 1.78 | 0.47 | 7.23 |
| chr17 | 17779528  | SMCR5        | 0.07 | 4.25 | 7.22 |
| chr6  | 6588700   | LY86         | 1.99 | 0.86 | 7.18 |
| chr1  | 17372195  | PADI6        | 0.21 | 0.75 | 7.18 |
| chr12 | 80217318  | OTOGL        | 1.66 | 2.15 | 7.13 |
| chr11 | 102317483 | BIRC3        | 0.46 | 0.00 | 7.13 |
| chr1  | 234373700 | COA6         | 0.13 | 0.00 | 7.13 |
| chr17 | 43171187  | NBR1         | 1.20 | 1.45 | 7.13 |
| chr1  | 31704166  | COL16A1      | 0.37 | 0.00 | 7.12 |
| chr10 | 114282512 | VWA2         | 0.75 | 0.80 | 7.12 |
| chr8  | 85438826  | CA3          | 2.55 | 0.73 | 7.11 |
| chr15 | 52709816  | FAM214A      | 0.95 | 1.02 | 7.11 |
| chr17 | 28861729  | MIR4732      | 0.75 | 0.13 | 7.11 |
| chr7  | 64794387  | ZNF138       | 1.32 | 0.00 | 7.11 |
| chr6  | 159805642 | PNLDC1       | 0.22 | 0.00 | 7.10 |
| chr13 | 102880098 | METTL21EP    | 0.89 | 0.96 | 7.09 |
| chr20 | 45705179  | MIR3617      | 0.38 | 1.55 | 7.09 |
| chr8  | 78724373  | LOC101241902 | 1.19 | 0.00 | 7.09 |
| chr22 | 20114750  | MIR6816      | 0.21 | 0.00 | 7.09 |
| chr12 | 102120138 | NUP37        | 0.22 | 0.00 | 7.09 |
| chr3  | 39406688  | RPSA         | 0.71 | 0.91 | 7.09 |
| chr8  | 23854806  | STC1         | 1.51 | 0.00 | 7.08 |
| chr3  | 105366712 | ALCAM        | 0.11 | 0.00 | 7.06 |
| chr1  | 114758049 | CSDE1        | 0.06 | 2.98 | 7.06 |
| chr19 | 14529542  | MIR639       | 0.52 | 0.00 | 7.06 |
| chr9  | 102519636 | LINC00587    | 0.10 | 1.56 | 7.03 |
| chr9  | 122477925 | OR1J1        | 1.18 | 1.27 | 7.02 |
| chr10 | 105086568 | SORCS3       | 0.09 | 1.10 | 7.00 |
| chr3  | 169911571 | SAMD7        | 0.59 | 0.00 | 7.00 |
| chr13 | 46797680  | ESD          | 0.10 | 0.07 | 6.97 |
| chr22 | 16592809  | CCT8L2       | 0.10 | 0.62 | 6.94 |
| chr20 | 18379048  | LINC00851    | 0.88 | 0.62 | 6.94 |
| chr1  | 103108579 | COL11A1      | 0.32 | 0.00 | 6.91 |
| chr16 | 2033664   | SLC9A3R2     | 0.25 | 0.19 | 6.91 |
| chr11 | 16476387  | SOX6         | 0.16 | 0.51 | 6.90 |
| chr10 | 110871794 | PDCD4        | 2.52 | 0.00 | 6.89 |
| chr13 | 70107212  | ATXN8OS      | 1.13 | 1.49 | 6.88 |
| chr7  | 111091005 | LRRN3        | 0.67 | 0.91 | 6.88 |
| chr6  | 46687874  | TDRD6        | 1.12 | 0.00 | 6.86 |
| chr1  | 145707506 | PDZK1        | 2.71 | 0.88 | 6.84 |
| chr22 | 20917425  | CRKL         | 0.09 | 0.00 | 6.83 |
| chr14 | 104699406 | INF2         | 1.04 | 1.25 | 6.83 |
| chr20 | 57321590  | MIR4325      | 1.48 | 0.73 | 6.82 |
| chr17 | 2329209   | SNORD91B     | 1.28 | 2.55 | 6.81 |
| chr22 | 20249210  | MIR1286      | 1.87 | 0.40 | 6.80 |
| chr16 | 67936876  | PSMB10       | 0.05 | 0.14 | 6.80 |
| chr21 | 42219897  | ABCG1        | 0.01 | 0.00 | 6.80 |
| chr3  | 8733799   | CAV3         | 0.60 | 0.66 | 6.80 |
| chr16 | 86578508  | FOXL1        | 2.26 | 3.80 | 6.80 |
| chr5  | 170199140 | LINC01187    | 0.66 | 0.00 | 6.80 |
| chr6  | 89828020  | MDN1         | 0.15 | 1.08 | 6.80 |
| chr1  | 157700984 | FCRL3        | 0.95 | 0.00 | 6.79 |
| chr13 | 38349770  | UFM1         | 0.49 | 0.00 | 6.77 |
| chr12 | 124915546 | MIR5188      | 0.55 | 1.97 | 6.75 |
| chr5  | 140867512 | PCDHA11      | 0.96 | 0.00 | 6.73 |
| chr14 | 94640724  | SERPINA13P   | 0.73 | 2.72 | 6.73 |
| chr1  | 145910188 | ITGA10       | 2.33 | 1.10 | 6.73 |
| chr3  | 155745722 | PLCH1        | 3.06 | 1.34 | 6.73 |
| chr16 | 81077266  | C16orf46     | 2.08 | 0.00 | 6.72 |
| chr11 | 128587592 | ETS1         | 0.00 | 0.07 | 6.70 |
| chr6  | 40378423  | TDRG1        | 0.74 | 0.50 | 6.70 |

|       |           |              |      |      |      |
|-------|-----------|--------------|------|------|------|
| chr7  | 29483815  | CHN2         | 2.64 | 0.64 | 6.69 |
| chr7  | 100642779 | TFR2         | 1.45 | 2.51 | 6.68 |
| chr16 | 5066144   | C16orf89     | 0.54 | 0.64 | 6.66 |
| chr6  | 46746928  | ANKRD66      | 1.17 | 2.32 | 6.65 |
| chr16 | 68236232  | ESRP2        | 2.37 | 0.77 | 6.65 |
| chr10 | 5666594   | ASB13        | 1.13 | 0.00 | 6.63 |
| chr3  | 138947139 | FOXL2        | 3.59 | 0.00 | 6.63 |
| chr7  | 30594892  | GARS         | 0.29 | 0.00 | 6.63 |
| chr20 | 32052187  | HCK          | 0.00 | 0.00 | 6.63 |
| chr1  | 1013466   | ISG15        | 0.21 | 0.00 | 6.63 |
| chr1  | 175023454 | MRPS14       | 0.98 | 1.37 | 6.63 |
| chr13 | 31739552  | RXFP2        | 2.11 | 0.61 | 6.62 |
| chr2  | 14400957  | LINC00276    | 2.32 | 1.87 | 6.61 |
| chr12 | 7670598   | APOBEC1      | 1.13 | 0.90 | 6.61 |
| chr17 | 48579946  | MIR10A       | 1.81 | 0.82 | 6.61 |
| chr15 | 74812852  | LMAN1L       | 2.36 | 0.81 | 6.58 |
| chr6  | 89595925  | ANKRD6       | 1.68 | 0.88 | 6.56 |
| chr5  | 54744257  | LOC102467080 | 0.78 | 1.67 | 6.56 |
| chr3  | 75630762  | MIR1324      | 0.00 | 3.62 | 6.56 |
| chr14 | 64215953  | SYNE2        | 0.68 | 0.72 | 6.56 |
| chr4  | 172697628 | GALNTL6      | 0.24 | 0.00 | 6.55 |
| chr11 | 62299063  | SCGB1D4      | 1.61 | 0.00 | 6.55 |
| chr15 | 76336723  | ISL2         | 1.35 | 0.91 | 6.51 |
| chr1  | 3458701   | ARHGEF16     | 0.63 | 0.00 | 6.49 |
| chr8  | 65634216  | ARMC1        | 0.16 | 0.99 | 6.49 |
| chr2  | 180007358 | CWC22        | 1.08 | 0.00 | 6.49 |
| chr3  | 25664938  | MIR4442      | 0.67 | 2.62 | 6.49 |
| chr5  | 41510627  | PLCXD3       | 0.08 | 1.16 | 6.49 |
| chr13 | 19561573  | TPTE2        | 2.10 | 1.36 | 6.48 |
| chr5  | 40841307  | CARD6        | 1.54 | 1.97 | 6.45 |
| chr6  | 49463327  | MUT          | 2.67 | 5.01 | 6.42 |
| chr15 | 52295797  | MYO5C        | 0.82 | 0.00 | 6.41 |
| chr9  | 89312224  | MIR3153      | 0.70 | 1.14 | 6.40 |
| chr4  | 98997386  | MIR3684      | 0.16 | 0.76 | 6.39 |
| chr17 | 32992850  | SPACA3       | 0.62 | 1.45 | 6.39 |
| chr2  | 75646782  | MRPL19       | 0.62 | 0.00 | 6.38 |
| chr3  | 157123001 | LINC00880    | 0.16 | 0.00 | 6.37 |
| chr14 | 70564741  | ADAM20       | 0.26 | 0.04 | 6.36 |
| chr20 | 18467184  | DZANK1       | 0.12 | 0.00 | 6.33 |
| chr1  | 100178272 | LRRC39       | 2.18 | 0.04 | 6.32 |
| chr7  | 102293102 | MIR4285      | 1.45 | 0.00 | 6.31 |
| chr4  | 164977665 | TRIM61       | 3.22 | 1.02 | 6.31 |
| chr6  | 100881371 | ASCC3        | 0.35 | 0.00 | 6.30 |
| chr1  | 161707228 | FCRLA        | 2.57 | 0.65 | 6.30 |
| chr19 | 37507167  | ZNF793       | 1.36 | 0.00 | 6.30 |
| chr11 | 61362298  | CYB561A3     | 0.55 | 0.00 | 6.30 |
| chr12 | 57547330  | DCTN2        | 0.96 | 1.65 | 6.30 |
| chr7  | 27165529  | HOXA9        | 0.47 | 2.53 | 6.30 |
| chr19 | 55334042  | TMEM150B     | 1.96 | 0.00 | 6.30 |
| chr17 | 4264025   | ANKFY1       | 1.71 | 1.91 | 6.28 |
| chr1  | 15976131  | ZBTB17       | 2.13 | 0.05 | 6.28 |
| chr22 | 24181475  | SUSD2        | 1.66 | 0.34 | 6.28 |
| chr13 | 19181851  | TUBA3C       | 0.11 | 0.89 | 6.28 |
| chr7  | 130543452 | COPG2IT1     | 0.28 | 1.10 | 6.26 |
| chr16 | 66918983  | CDH16        | 1.33 | 0.99 | 6.26 |
| chr16 | 86196180  | LINC01082    | 0.27 | 0.00 | 6.26 |
| chr1  | 86156986  | COL24A1      | 0.93 | 3.07 | 6.26 |
| chr17 | 31321748  | EVI2A        | 0.30 | 0.73 | 6.26 |
| chr2  | 186600204 | ITGAV        | 1.23 | 0.19 | 6.26 |
| chr4  | 146176008 | LSM6         | 0.15 | 0.97 | 6.26 |
| chr22 | 30425622  | MTFP1        | 0.99 | 1.02 | 6.26 |
| chr16 | 19522144  | GDE1         | 0.73 | 0.99 | 6.25 |
| chr3  | 151329548 | P2RY13       | 0.99 | 1.51 | 6.24 |
| chr5  | 34043265  | C1QTNF3      | 2.25 | 2.23 | 6.23 |
| chr8  | 87874067  | DCAF4L2      | 0.60 | 0.00 | 6.21 |

|       |           |           |      |      |      |
|-------|-----------|-----------|------|------|------|
| chr19 | 39498916  | DLL3      | 0.43 | 0.00 | 6.20 |
| chr6  | 3094001   | RIPK1     | 0.88 | 0.00 | 6.20 |
| chr6  | 24495162  | GPLD1     | 0.06 | 0.00 | 6.20 |
| chr8  | 98944328  | STK3      | 1.79 | 0.15 | 6.19 |
| chr1  | 230714589 | AGT       | 2.96 | 1.05 | 6.17 |
| chr1  | 171338895 | TOP1P1    | 4.13 | 0.00 | 6.15 |
| chr4  | 176002690 | GPM6A     | 1.57 | 1.75 | 6.15 |
| chr1  | 217137756 | ESRRG     | 0.45 | 1.51 | 6.13 |
| chr16 | 56904263  | MIR6863   | 1.65 | 0.92 | 6.12 |
| chr19 | 42740515  | PSG3      | 1.70 | 1.96 | 6.10 |
| chr1  | 47190098  | PDZK1IP1  | 0.46 | 0.85 | 6.10 |
| chr14 | 71398336  | SNORD56B  | 0.09 | 1.60 | 6.10 |
| chr7  | 29990288  | SCRN1     | 0.59 | 0.55 | 6.08 |
| chr2  | 219218989 | ABCB6     | 0.39 | 0.00 | 6.08 |
| chr7  | 1056103   | GPR146    | 0.19 | 0.76 | 6.06 |
| chr12 | 56362798  | APOF      | 1.19 | 0.71 | 6.06 |
| chr11 | 90555856  | MIR4490   | 1.05 | 2.23 | 6.05 |
| chr1  | 158831377 | MNDA      | 0.12 | 0.73 | 6.04 |
| chr12 | 57430998  | R3HDM2    | 0.30 | 0.23 | 6.04 |
| chr6  | 44342659  | SPATS1    | 0.79 | 0.76 | 6.04 |
| chr7  | 149776041 | SSPO      | 0.74 | 1.19 | 6.04 |
| chr16 | 29790967  | KIF22     | 1.73 | 2.46 | 6.03 |
| chr1  | 233624151 | MIR4427   | 1.03 | 2.16 | 6.03 |
| chr5  | 27472291  | LINC01021 | 0.42 | 0.71 | 6.01 |

**Table S5. Clinical medication records of the severe case.**

| Date           | Clinical medication                                                                                                                                                                                                                                                           | Increase/Decrease Dosage                                                                                                                                                                                                                                                                             | Auxiliary Survival                                                                                                                                                                                                                    |
|----------------|-------------------------------------------------------------------------------------------------------------------------------------------------------------------------------------------------------------------------------------------------------------------------------|------------------------------------------------------------------------------------------------------------------------------------------------------------------------------------------------------------------------------------------------------------------------------------------------------|---------------------------------------------------------------------------------------------------------------------------------------------------------------------------------------------------------------------------------------|
| Hospital Day 2 | Use Doxycycline<br>Use Interferon atomization<br>Use Methylprednisolone (80mg)<br>Use Thymopentin + Immunoglobulin (10g)<br>Use Meropenem + Linezolid<br>Use Abidor + Kridge<br>Use Xuebijing + Ulinastatin<br>Use Norepinephrine<br>Use Mosapride<br>Use Human albumin (10g) |                                                                                                                                                                                                                                                                                                      | Invasive Ventilator ( SIMV mode<br>VT 450 mL<br>PS 15 cmH2O<br>PEEP 12 cmH2O<br>FiO2 70%<br>Respiration ratio 1:1.5<br>Frequency 20 bpm.<br>)<br>Right subclavian vein puncture catheterization<br>Right femoral vein catheterization |
| Hospital Day 3 | Stop Linezolid<br>Stop Kridge<br>Use Midazolam<br>Use Morphine + Fentanyl<br>Use Amiodarone (Intravenous injection)<br>Use Enteral nutrition (1000 mL)                                                                                                                        | Maintain CRRT 12 hr.<br>Maintain Meropenem<br>Maintain Thymopentin                                                                                                                                                                                                                                   | Invasive Ventilator ( Decrease PS from 15 to 12 cm H2O<br>Decrease FiO2 from 70% to 50 %<br>)                                                                                                                                         |
| Hospital Day 4 | Stop Amiodarone<br>Use Simendan                                                                                                                                                                                                                                               | Maintain CRRT 12 hr.<br>Maintain Meropenem<br>Maintain Thymopentin<br>Maintain Midazolam + Fentanyl<br>Maintain Enteral nutrition<br>Decrease Morphine to 1 mg/h                                                                                                                                     | Invasive Ventilator ( Increase VT from 450 to 500 mL<br>Increase PS from 12 to 15 cm H2O<br>Increase PEEP from 12 to 16 cm H2O<br>Decrease Frequency from 20 to 18 bpm.<br>)                                                          |
| Hospital Day 5 | Stop Morphine                                                                                                                                                                                                                                                                 | Maintain CRRT 12 hr.<br>Maintain Meropenem<br>Maintain Thymopentin<br>Maintain Midazolam + Fentanyl<br>Increase Enteral nutrition from 1000 to 1500 mL                                                                                                                                               | Intermittent non-invasive ventilator ( ST mode<br>FiO2 60%<br>IPAP 15 cmH2O<br>EPAP 11 cmH2O<br>Frequency 20 bpm.<br>)                                                                                                                |
| Hospital Day 6 | Use Human albumin (40g, 10 mg/h)                                                                                                                                                                                                                                              | Maintain CRRT 12 hr.<br>Maintain Meropenem<br>Maintain Thymopentin<br>Maintain Midazolam + Fentanyl                                                                                                                                                                                                  | Invasive Ventilator ( Increase VT from 500 to 550 mL<br>Increase PS from 12 to 15 cm H2O<br>Decrease PEEP from 16 to 11 cmH2O<br>Increase FiO2 from 50% to 70 %<br>Increase Frequency from 18 to 24 bpm.<br>)                         |
| Hospital Day 7 | Stop Meropenem<br>Use Caspofungin + Tezhixing + Daltotropin<br>Use Amiodarone (oral)                                                                                                                                                                                          | Maintain CRRT 8 hr.<br>Maintain Thymopentin<br>Maintain Midazolam + Fentanyl                                                                                                                                                                                                                         |                                                                                                                                                                                                                                       |
| Hospital Day 8 | Stop Xuebijing<br>Stop Mucosolvan                                                                                                                                                                                                                                             | Maintain Amiodarone (oral)<br>Maintain CRRT 8 hr.<br>Maintain Caspofungin + piperacillin + tazobactam + Daltotropin<br>Maintain Abidor<br>Maintain Thymopentin<br>Maintain Midazolam + Fentanyl<br>Maintain Human albumin (at least 30g, 10 mg/h)<br>Decrease Enteral nutrition from 1500 to 1000 mL | Invasive Ventilator ( Increase VT from 550 to 650 mL<br>Decrease PEEP from 11 to 10 cmH2O<br>Increase FiO2 from 70% to 100 %<br>)                                                                                                     |
| Hospital Day 9 | Use Remifentanyl (0.04 ug/Kg-min)<br>Stop CRRT<br>Stop Caspofungin (1 day)                                                                                                                                                                                                    | Maintain Midazolam (3 ug/Kg-min)<br>Maintain piperacillin + tazobactam                                                                                                                                                                                                                               | Invasive Ventilator ( Decrease FiO2 from 100% to 90%<br>)                                                                                                                                                                             |

|                        |                                                                                                                                           |                                                                                                                                                                                                                                                                                           |                                                                                                                                                                          |
|------------------------|-------------------------------------------------------------------------------------------------------------------------------------------|-------------------------------------------------------------------------------------------------------------------------------------------------------------------------------------------------------------------------------------------------------------------------------------------|--------------------------------------------------------------------------------------------------------------------------------------------------------------------------|
|                        | Use Saline (100 mL, total <= 2500 mL)                                                                                                     | + Daltotropin<br>Maintain Amiodarone (oral)<br>Maintain Abidor<br>Maintain Thymopentin<br>Maintain Fentanyl                                                                                                                                                                               |                                                                                                                                                                          |
| <b>Hospital Day 10</b> | Use Ceylon Amiodarone<br>Use Amiodarone (Intravenous injection, 0.15g)<br>Remove subclavian and femoral vein catheters<br>Use Rivaroxaban | Maintain Midazolam<br>(3 ug/Kg-min)<br>Maintain Remifentanil<br>(0.04 ug/Kg-min)<br>Maintain Caspofungin + piperacillin + tazobactam + Daltotropin<br>Maintain Amiodarone (oral)<br>Maintain Abidor<br>Maintain Thymopentin<br>Maintain Fentanyl                                          | Invasive Ventilator ( Decrease VT from 650 to 600 mL Increase PEEP from 11 to 12 cmH2O Decrease FiO2 from 90% to 65 % )<br>Left subclavian vein puncture catheterization |
| <b>Hospital Day 11</b> | Use Norepinephrine (0.4 ug/Kg-min)<br>Stop Tezhixing<br>Stop Daltotropin<br>Use Supran + Tigecycline<br>Stop Rivaroxaban (10mg)           | Maintain Midazolam<br>(3 ug/Kg-min)<br>Maintain Remifentanil<br>(0.04 ug/Kg-min)<br>Maintain Caspofungin<br>Maintain Amiodarone (oral)<br>Maintain Abidor<br>Maintain Thymopentin<br>Maintain Fentanyl                                                                                    | Invasive Ventilator ( Increase FiO2 from 65% to 70 % )                                                                                                                   |
| <b>Hospital Day 12</b> | Use Furosemide diuretic + calcium gluconate<br>Use Trimetazidine tablets<br>+ glycyrrhizin tablets                                        | Maintain Midazolam<br>(3 ug/Kg-min)<br>Maintain Remifentanil<br>(0.04 ug/Kg-min)<br>Decrease Norepinephrine (from 0.4 to 0.3 ug/Kg-min)<br>Maintain Supran + Tigecycline + Caspofungin<br>Maintain Amiodarone (oral)<br>Maintain Abidor<br>Maintain Thymopentin<br>Maintain Fentanyl      | Invasive Ventilator ( Decrease FiO2 from 70% to 45 % )<br>CRRT 6 hr.<br>Left femoral vein catheterization                                                                |
| <b>Hospital Day 13</b> | Use Bisolol 2.5mg qd.                                                                                                                     | Decrease Amiodarone to 0.2g qd.<br>Maintain CRRT 8hr.<br>Increase Albumin<br>Decrease Remifentanil (from 0.04 to 0.01 ug/Kg -min)                                                                                                                                                         | Invasive Ventilator ( Increase FiO2 from 45% to 55 % )                                                                                                                   |
| <b>Hospital Day 14</b> |                                                                                                                                           | Maintain Midazolam<br>(3 ug/Kg-min)<br>Maintain Remifentanil<br>(0.01 ug/Kg-min)<br>Maintain Norepinephrine<br>(0.3 ug/Kg-min)<br>Maintain Supran + Tigecycline + Caspofungin<br>Maintain Amiodarone (oral) + Trimetazidine<br>Maintain CRRT<br>Maintain Thymopentin<br>Maintain Fentanyl | Invasive Ventilator ( Increase FiO2 from 55% to 60 % )                                                                                                                   |
| <b>Hospital Day 15</b> | Stop Supran<br>Use Tezhixing<br>Stop CRRT                                                                                                 | Maintain Midazolam<br>(3 ug/Kg-min)<br>Increase Remifentanil (from 0.01 to 0.04 ug/Kg -min)<br>Maintain Supran + Tigecycline + Caspofungin                                                                                                                                                | Blood transfusion ( 02/16 01:45-03:00 A+ 400 mL 02/16 20:45-23:00 A+ 200 mL 02/16 23:25 to 02/17 04:00 Suspended red blood cells 4U )                                    |



|                        |                                                                                                                                                                                                                                                       |                                                                                                                                                                                            |                                                                                                                                                                                                         |
|------------------------|-------------------------------------------------------------------------------------------------------------------------------------------------------------------------------------------------------------------------------------------------------|--------------------------------------------------------------------------------------------------------------------------------------------------------------------------------------------|---------------------------------------------------------------------------------------------------------------------------------------------------------------------------------------------------------|
|                        |                                                                                                                                                                                                                                                       | Maintain Thymopentin<br>Maintain Fentanyl                                                                                                                                                  | Invasive Ventilator ( Decrease PEEP from 12 to 10 cmH2O )                                                                                                                                               |
| <b>Hospital Day 16</b> | Stop Anticoagulant related medicine<br>Stop CRRT<br>Use Albumin (20g)<br>Use Somatostatin<br>Use Omeprazole<br>Use Cavin + Vitamins                                                                                                                   | Maintain Midazolam<br>(3 ug/Kg-min)<br>Maintain Remifentanyl<br>(0.04 ug/Kg-min)<br>Maintain Tezhixing + Tigecycline + Caspofungin                                                         | Invasive Ventilator ( Decrease FiO2 from 60%to 50 % )                                                                                                                                                   |
| <b>Hospital Day 17</b> | Remove femoral vein catheters<br>Stop CRRT                                                                                                                                                                                                            | Maintain Cavin (800 mL) + Enteral nutrition (500 mL)<br>Maintain Tezhixing + Tigecycline + Caspofungin                                                                                     | Invasive Ventilator ( Decrease PEEP from 10 to 8 c mH2O )                                                                                                                                               |
| <b>Hospital Day 18</b> | Use Propofol (15ug/Kg-min)<br>Stop Somatostatin<br>Stop Omeprazole<br>Use Pantoprazole (oral)<br>Stop Amiodarone<br>Use Bisoral 2.5mg qd.<br>Stop Cavin<br>Stop Tezhixing<br>Use Ceftazidime avitastat<br>Use Albumin (30g)<br>Use Chloroquine (oral) | Decrease Remifentanyl<br>(from 0.04 to 0.02 ug/Kg -min)<br>Maintain Tezhixing + Tigecycline + Caspofungin<br>Increase Enteral nutrition from 500 to 1000 mL                                | Invasive Ventilator ( Increase PEEP from 8 to 9 cmH 2O )                                                                                                                                                |
| <b>Hospital Day 19</b> | Use Rivaroxaban<br>Stop Caspofungin<br>Use Voricone<br>Stop Chloroquine phosphate<br>Use Albumin (20g, 10mL/h)                                                                                                                                        | Maintain Tigecycline + Ceftazidime avitastat                                                                                                                                               | Invasive Ventilator ( Decrease FiO2 from 60%to 45 %<br>Decrease VT from 600 to 500 mL<br>Decrease PEEP from 9 to 8 c mH2O<br>Decrease Frequency from 24 to 19 bpm )                                     |
| <b>Hospital Day 20</b> | Use Linezamide + Caspofungin + Daltotropin<br>Use Somatostatin<br>Use Omeprazole<br>Stop Enteral nutrition<br>Use CRRT 6 hr.<br>Stop Traditional Chinese medicine<br>Use Acetylcysteine nebulization                                                  | Decrease Propofol to 20 ug/Kg-min<br>Maintain Midazolam<br>(3 ug/Kg-min)<br>Maintain Remifentanyl<br>(0.04 ug/Kg-min)<br>Maintain Ceftazidime avitastat<br>Increase Ambroxol to 240mg q12h | Invasive Ventilator ( Decrease FiO2 from 45%to 40 %<br>Decrease VT from 500 to 450 mL<br>Decrease PS from 15 to 12 cm H2O<br>Decrease PEEP from 8 to 4 c mH2O<br>Increase Frequency from 19 to 20 bpm ) |
| <b>Hospital Day 21</b> | Use Chloroquine (0.4g)<br>Stop Daltotropin<br>Use Vancomycin (0.5g q8h)<br>Use Recovery patient's plasma<br>Use Albumin (20g, 10mL/h)<br>Use CRRT                                                                                                     | Maintain Linezamide + Caspofungin + Ceftazidime avitastat                                                                                                                                  | Invasive Ventilator ( Increase FIO2 from 40% to 70 %<br>Decrease VT from 450 to 440 mL<br>Increase Frequency from 20 to 35 bpm )                                                                        |

**Table S6. Clinical medication records of the mild case.**

| Date            | Clinical medication                                                                          | Increase/Decrease Dosage                                                                                         | Auxiliary Survival |
|-----------------|----------------------------------------------------------------------------------------------|------------------------------------------------------------------------------------------------------------------|--------------------|
| Hospital Day 1  | Use Interferon atomization<br>Use Lopinavilidonavi<br>Use Moxifloxacin<br>Use Abidor + Kreiz |                                                                                                                  |                    |
| Hospital Day 1  |                                                                                              | Maintain Interferon<br><br>atomization<br>+ Lopinavilidonavi<br>Maintain Moxifloxacin<br>Maintain Abidor + Kreiz |                    |
| Hospital Day 11 |                                                                                              | Scheme as before                                                                                                 |                    |
| Hospital Day 17 | Stop Kreiz                                                                                   | Scheme as before                                                                                                 |                    |
| Hospital Day 22 | Stop Chloroquine<br>phosphate                                                                |                                                                                                                  |                    |

**Table S7. Microbiomes infected in plasma of cases and controls<sup>1</sup>.**

| Sample   | Species                                   | Coverate rate | Depth | No. of uniquely mapped reads | Type of microbimes |
|----------|-------------------------------------------|---------------|-------|------------------------------|--------------------|
| Control1 | <i>Stenotrophomonas maltophilia</i>       | 82.06         | 6.51  | 89132                        | Bacteria           |
|          | <i>Pseudomonas sp. TKP</i>                | 8.31          | 1.08  | 4129                         | Bacteria           |
|          | <i>Pseudomonas fluorescens</i>            | 9.17          | 1.11  | 1088                         | Bacteria           |
|          | <i>Cuti Bacteriaterium acnes</i>          | 28.39         | 1.21  | 7045                         | Bacteria           |
|          | <i>Elizabethkingia miricola</i>           | 8.32          | 1.10  | 1113                         | Bacteria           |
|          | <i>Elizabethkingia anophelis</i>          | 5.38          | 1.09  | 425                          | Bacteria           |
|          | <i>Staphylococcus capitis</i>             | 4.30          | 1.04  | 876                          | Bacteria           |
|          | <i>Staphylococcus haemolyticus</i>        | 3.45          | 1.03  | 851                          | Bacteria           |
|          | <i>Variovorax paradoxus</i>               | 6.10          | 1.17  | 639                          | Bacteria           |
| Control2 | <i>Stenotrophomonas maltophilia</i>       | 78.30         | 4.27  | 56407                        | Bacteria           |
|          | <i>Pseudomonas sp. TKP</i>                | 9.79          | 1.08  | 4937                         | Bacteria           |
|          | <i>Pseudomonas fluorescens</i>            | 12.09         | 1.14  | 1430                         | Bacteria           |
|          | <i>Cuti Bacteriaterium acnes</i>          | 9.07          | 1.06  | 2014                         | Bacteria           |
|          | <i>Elizabethkingia miricola</i>           | 4.45          | 1.06  | 608                          | Bacteria           |
|          | <i>Variovorax paradoxus</i>               | 6.02          | 1.15  | 628                          | Bacteria           |
| Mild1    | <i>Chryseo Bacteriaterium indologenes</i> | 46.02         | 1.49  | 32259                        | Bacteria           |
|          | <i>Cuti Bacteriaterium acnes</i>          | 7.48          | 1.05  | 1661                         | Bacteria           |
| Mild2    | <i>Methylophilus methylotrophus</i>       | 6.43          | 1.05  | 1437                         | Bacteria           |
|          | <i>Chryseo Bacteriaterium indologenes</i> | 42.17         | 1.42  | 28162                        | Bacteria           |
| Mild3    | <i>Methylophilus methylotrophus</i>       | 5.19          | 1.03  | 1148                         | Bacteria           |
|          | <i>Chryseo Bacteriaterium indologenes</i> | 35.68         | 1.33  | 22399                        | Bacteria           |
| Mild4    | <i>Methylophilus methylotrophus</i>       | 4.27          | 1.03  | 940                          | Bacteria           |
|          | <i>Chryseo Bacteriaterium indologenes</i> | 47.46         | 1.54  | 34338                        | Bacteria           |
| Severe3  | <i>Methylophilus methylotrophus</i>       | 7.29          | 1.05  | 1641                         | Bacteria           |
|          | <i>Chryseo Bacteriaterium indologenes</i> | 4.99          | 1.03  | 2326                         | Bacteria           |
| Severe4  | <i>Chryseo Bacteriaterium indologenes</i> | 5.50          | 1.04  | 2658                         | Bacteria           |
| Severe3  | Human betaherpesvirus 5                   | 10.60         | 1.10  | 249                          | Virus              |
|          | Human betaherpesvirus 5                   | 74.81         | 2.18  | 3593                         | Virus              |
| Severe4  | Human alphaherpesvirus 1                  | 3.54          | 1.03  | 52                           | Virus              |

1. Microbiomes with no. of uniquely mapped reads above 10 and coverage rate (coverage of viruses divided by coverage of autosomes) above 3 were included.

**Table S8. Results on pathway analysis of the 6 clusters from coverage around 200bp-TSSs from cfDNA of one mild case, one severe case, and two controls<sup>1</sup>.**

| Cluster  | Pathway                                                                                  | Found entities | Total entities | Ratio    | p value  | FDR      | Found reaction | Total reaction | Ratio    |
|----------|------------------------------------------------------------------------------------------|----------------|----------------|----------|----------|----------|----------------|----------------|----------|
|          | Digestion of dietary lipid                                                               | 1              | 7              | 6.14E-04 | 1.16E-02 | 1.54E-01 | 3              | 8              | 6.47E-04 |
|          | Digestion                                                                                | 1              | 22             | 1.93E-03 | 3.61E-02 | 1.54E-01 | 3              | 24             | 1.94E-03 |
|          | Digestion and absorption                                                                 | 1              | 27             | 2.37E-03 | 4.41E-02 | 1.54E-01 | 3              | 30             | 2.42E-03 |
|          | Tat-mediated HIV elongation arrest and recovery                                          | 1              | 35             | 3.07E-03 | 5.68E-02 | 1.54E-01 | 3              | 3              | 2.42E-04 |
|          | Pausing and recovery of Tat-mediated HIV elongation                                      | 1              | 35             | 3.07E-03 | 5.68E-02 | 1.54E-01 | 2              | 2              | 1.62E-04 |
|          | HIV elongation arrest and recovery                                                       | 1              | 36             | 3.16E-03 | 5.84E-02 | 1.54E-01 | 3              | 3              | 2.42E-04 |
|          | Pausing and recovery of HIV elongation                                                   | 1              | 36             | 3.16E-03 | 5.84E-02 | 1.54E-01 | 2              | 2              | 1.62E-04 |
|          | Retinoid metabolism and transport                                                        | 1              | 44             | 3.86E-03 | 7.09E-02 | 1.54E-01 | 1              | 26             | 2.10E-03 |
|          | Tat-mediated elongation of the HIV-1 transcript                                          | 1              | 47             | 4.12E-03 | 7.55E-02 | 1.54E-01 | 4              | 8              | 6.47E-04 |
|          | HIV Transcription Elongation                                                             | 1              | 47             | 4.12E-03 | 7.55E-02 | 1.54E-01 | 4              | 15             | 1.21E-03 |
|          | Formation of HIV-1 elongation complex containing HIV-1 Tat                               | 1              | 47             | 4.12E-03 | 7.55E-02 | 1.54E-01 | 1              | 5              | 4.04E-04 |
|          | Formation of HIV elongation complex in the absence of HIV Tat                            | 1              | 48             | 4.21E-03 | 7.71E-02 | 1.54E-01 | 1              | 2              | 1.62E-04 |
|          | Metabolism of fat-soluble vitamins                                                       | 1              | 48             | 4.21E-03 | 7.71E-02 | 1.54E-01 | 1              | 32             | 2.59E-03 |
|          | RNA Polymerase II Transcription Elongation                                               | 1              | 61             | 5.35E-03 | 9.70E-02 | 1.54E-01 | 4              | 8              | 6.47E-04 |
|          | Formation of RNA Pol II elongation complex                                               | 1              | 61             | 5.35E-03 | 9.70E-02 | 1.54E-01 | 1              | 2              | 1.62E-04 |
|          | TP53 Regulates Transcription of DNA Repair Genes                                         | 1              | 65             | 5.70E-03 | 1.03E-01 | 1.54E-01 | 3              | 17             | 1.37E-03 |
|          | Transcription of the HIV genome                                                          | 1              | 74             | 6.49E-03 | 1.16E-01 | 1.54E-01 | 15             | 47             | 3.80E-03 |
|          | RNA Polymerase II Pre-transcription Events                                               | 1              | 84             | 7.37E-03 | 1.31E-01 | 1.54E-01 | 7              | 17             | 1.37E-03 |
|          | Visual phototransduction                                                                 | 1              | 100            | 8.78E-03 | 1.54E-01 | 1.54E-01 | 1              | 82             | 6.63E-03 |
|          | Late Phase of HIV Life Cycle                                                             | 1              | 152            | 1.33E-02 | 2.25E-01 | 2.25E-01 | 15             | 76             | 6.14E-03 |
|          | HIV Life Cycle                                                                           | 1              | 165            | 1.45E-02 | 2.42E-01 | 2.42E-01 | 15             | 114            | 9.21E-03 |
|          | Metabolism of vitamins and cofactors                                                     | 1              | 192            | 1.69E-02 | 2.76E-01 | 2.76E-01 | 1              | 185            | 1.50E-02 |
|          | Ub-specific processing proteases                                                         | 1              | 205            | 1.80E-02 | 2.92E-01 | 2.92E-01 | 2              | 40             | 3.23E-03 |
|          | HIV Infection                                                                            | 1              | 248            | 2.18E-02 | 3.42E-01 | 3.42E-01 | 15             | 157            | 1.27E-02 |
|          | Deubiquitination                                                                         | 1              | 282            | 2.47E-02 | 3.79E-01 | 3.79E-01 | 2              | 77             | 6.22E-03 |
|          | Transcriptional Regulation by TP53                                                       | 1              | 367            | 3.22E-02 | 4.63E-01 | 4.63E-01 | 3              | 258            | 2.09E-02 |
|          | G alpha (i) signalling events                                                            | 1              | 408            | 3.58E-02 | 5.00E-01 | 5.00E-01 | 1              | 155            | 1.25E-02 |
|          | Infectious disease                                                                       | 1              | 1040           | 9.13E-02 | 8.38E-01 | 8.38E-01 | 15             | 485            | 3.92E-02 |
|          | GPCR downstream signalling                                                               | 1              | 1154           | 1.01E-01 | 8.69E-01 | 8.69E-01 | 1              | 248            | 2.00E-02 |
|          | Signaling by GPCR                                                                        | 1              | 1226           | 1.08E-01 | 8.85E-01 | 8.85E-01 | 1              | 427            | 3.45E-02 |
|          | Generic Transcription Pathway                                                            | 1              | 1257           | 1.10E-01 | 8.91E-01 | 8.91E-01 | 3              | 823            | 6.65E-02 |
|          | RNA Polymerase II Transcription                                                          | 1              | 1379           | 1.21E-01 | 9.14E-01 | 9.14E-01 | 14             | 884            | 7.15E-02 |
|          | Post-translational protein modification                                                  | 1              | 1417           | 1.24E-01 | 9.20E-01 | 9.20E-01 | 2              | 513            | 4.15E-02 |
|          | Gene expression (Transcription)                                                          | 1              | 1521           | 1.33E-01 | 9.34E-01 | 9.34E-01 | 14             | 994            | 8.03E-02 |
|          | Disease                                                                                  | 1              | 1735           | 1.52E-01 | 9.57E-01 | 9.57E-01 | 15             | 1201           | 9.71E-02 |
|          | Metabolism of proteins                                                                   | 1              | 2012           | 1.77E-01 | 9.75E-01 | 9.75E-01 | 2              | 874            | 7.06E-02 |
|          | Metabolism                                                                               | 1              | 2142           | 1.88E-01 | 9.81E-01 | 9.81E-01 | 1              | 2001           | 1.62E-01 |
| Cluster2 | Signal Transduction                                                                      | 1              | 2829           | 2.48E-01 | 9.96E-01 | 9.96E-01 | 1              | 2333           | 1.89E-01 |
|          | Transport of nucleosides and free purine and pyrimidine bases across the plasma membrane | 2              | 12             | 1.05E-03 | 1.53E-03 | 2.00E-01 | 2              | 16             | 1.29E-03 |
| Cluster3 | Transport of vitamins, nucleosides, and related molecules                                | 2              | 44             | 3.86E-03 | 1.87E-02 | 3.16E-01 | 2              | 39             | 3.15E-03 |

|                                                                   |   |     |          |          |          |    |    |          |
|-------------------------------------------------------------------|---|-----|----------|----------|----------|----|----|----------|
| PKA-mediated phosphorylation of key metabolic factors             | 1 | 5   | 4.39E-04 | 2.34E-02 | 3.16E-01 | 3  | 5  | 4.04E-04 |
| HDL assembly                                                      | 1 | 8   | 7.02E-04 | 3.72E-02 | 3.16E-01 | 1  | 9  | 7.27E-04 |
| ROBO receptors bind AKAP5                                         | 1 | 9   | 7.90E-04 | 4.18E-02 | 3.16E-01 | 1  | 7  | 5.66E-04 |
| GP1b-IX-V activation signalling                                   | 1 | 12  | 1.05E-03 | 5.53E-02 | 3.16E-01 | 5  | 7  | 5.66E-04 |
| CREB1 phosphorylation through the activation of Adenylate Cyclase | 1 | 12  | 1.05E-03 | 5.53E-02 | 3.16E-01 | 4  | 6  | 4.85E-04 |
| Regulation of glycolysis by fructose 2,6-bisphosphate metabolism  | 1 | 12  | 1.05E-03 | 5.53E-02 | 3.16E-01 | 1  | 4  | 3.23E-04 |
| p130Cas linkage to MAPK signaling for integrins                   | 1 | 15  | 1.32E-03 | 6.87E-02 | 3.16E-01 | 3  | 3  | 2.42E-04 |
| GRB2:SOS provides linkage to MAPK signaling for Integrins         | 1 | 15  | 1.32E-03 | 6.87E-02 | 3.16E-01 | 2  | 2  | 1.62E-04 |
| Platelet Adhesion to exposed collagen                             | 1 | 15  | 1.32E-03 | 6.87E-02 | 3.16E-01 | 2  | 6  | 4.85E-04 |
| Rap1 signalling                                                   | 1 | 16  | 1.40E-03 | 7.31E-02 | 3.16E-01 | 1  | 7  | 5.66E-04 |
| Ub-specific processing proteases                                  | 3 | 205 | 1.80E-02 | 7.35E-02 | 3.16E-01 | 2  | 40 | 3.23E-03 |
| Serotonin Neurotransmitter Release Cycle                          | 1 | 18  | 1.58E-03 | 8.18E-02 | 3.16E-01 | 2  | 3  | 2.42E-04 |
| PKA activation                                                    | 1 | 18  | 1.58E-03 | 8.18E-02 | 3.16E-01 | 2  | 4  | 3.23E-04 |
| PKA activation in glucagon signalling                             | 1 | 18  | 1.58E-03 | 8.18E-02 | 3.16E-01 | 1  | 2  | 1.62E-04 |
| Plasma lipoprotein assembly                                       | 1 | 19  | 1.67E-03 | 8.62E-02 | 3.16E-01 | 1  | 19 | 1.54E-03 |
| PKA-mediated phosphorylation of CREB                              | 1 | 20  | 1.76E-03 | 9.05E-02 | 3.16E-01 | 4  | 7  | 5.66E-04 |
| CD209 (DC-SIGN) signaling                                         | 1 | 22  | 1.93E-03 | 9.91E-02 | 3.16E-01 | 1  | 11 | 8.89E-04 |
| Dopamine Neurotransmitter Release Cycle                           | 1 | 23  | 2.02E-03 | 1.03E-01 | 3.16E-01 | 2  | 4  | 3.23E-04 |
| Intrinsic Pathway of Fibrin Clot Formation                        | 1 | 23  | 2.02E-03 | 1.03E-01 | 3.16E-01 | 2  | 20 | 1.62E-03 |
| DARPP-32 events                                                   | 1 | 24  | 2.11E-03 | 1.08E-01 | 3.16E-01 | 4  | 12 | 9.70E-04 |
| Triglyceride catabolism                                           | 1 | 24  | 2.11E-03 | 1.08E-01 | 3.16E-01 | 2  | 17 | 1.37E-03 |
| Integrin signaling                                                | 1 | 28  | 2.46E-03 | 1.24E-01 | 3.16E-01 | 15 | 24 | 1.94E-03 |
| Glucagon signaling in metabolic regulation                        | 1 | 34  | 2.98E-03 | 1.49E-01 | 3.16E-01 | 1  | 6  | 4.85E-04 |
| Deubiquitination                                                  | 3 | 282 | 2.47E-02 | 1.49E-01 | 3.16E-01 | 2  | 77 | 6.22E-03 |
| Calmodulin induced events                                         | 1 | 35  | 3.07E-03 | 1.53E-01 | 3.16E-01 | 4  | 23 | 1.86E-03 |
| CaM pathway                                                       | 1 | 35  | 3.07E-03 | 1.53E-01 | 3.16E-01 | 4  | 24 | 1.94E-03 |
| Signaling by high-kinase activity BRAF mutants                    | 1 | 37  | 3.25E-03 | 1.61E-01 | 3.16E-01 | 4  | 6  | 4.85E-04 |
| Ca-dependent events                                               | 1 | 37  | 3.25E-03 | 1.61E-01 | 3.16E-01 | 4  | 27 | 2.18E-03 |
| Triglyceride metabolism                                           | 1 | 38  | 3.34E-03 | 1.65E-01 | 3.16E-01 | 2  | 24 | 1.94E-03 |
| Formation of Fibrin Clot (Clotting Cascade)                       | 1 | 39  | 3.42E-03 | 1.69E-01 | 3.16E-01 | 2  | 57 | 4.61E-03 |
| Platelet Aggregation (Plug Formation)                             | 1 | 40  | 3.51E-03 | 1.73E-01 | 3.16E-01 | 16 | 27 | 2.18E-03 |
| MAP2K and MAPK activation                                         | 1 | 41  | 3.60E-03 | 1.77E-01 | 3.16E-01 | 4  | 8  | 6.47E-04 |
| DAG and IP3 signaling                                             | 1 | 41  | 3.60E-03 | 1.77E-01 | 3.16E-01 | 4  | 28 | 2.26E-03 |
| RET signaling                                                     | 1 | 41  | 3.60E-03 | 1.77E-01 | 3.16E-01 | 1  | 24 | 1.94E-03 |
| Glucagon-like Peptide-1 (GLP1) regulates insulin secretion        | 1 | 43  | 3.77E-03 | 1.85E-01 | 3.16E-01 | 3  | 11 | 8.89E-04 |
| Vasopressin regulates renal water homeostasis via Aquaporins      | 1 | 44  | 3.86E-03 | 1.89E-01 | 3.16E-01 | 3  | 15 | 1.21E-03 |
| Signaling downstream of RAS mutants                               | 1 | 47  | 4.12E-03 | 2.00E-01 | 3.16E-01 | 4  | 7  | 5.66E-04 |
| Signaling by moderate kinase activity BRAF mutants                | 1 | 47  | 4.12E-03 | 2.00E-01 | 3.16E-01 | 4  | 7  | 5.66E-04 |
| Paradoxical activation of RAF signaling by kinase inactive BRAF   | 1 | 47  | 4.12E-03 | 2.00E-01 | 3.16E-01 | 4  | 7  | 5.66E-04 |
| Signaling by RAS mutants                                          | 1 | 47  | 4.12E-03 | 2.00E-01 | 3.16E-01 | 4  | 8  | 6.47E-04 |
| Neurotransmitter release cycle                                    | 1 | 51  | 4.48E-03 | 2.15E-01 | 3.16E-01 | 4  | 32 | 2.59E-03 |
| PLC beta mediated events                                          | 1 | 53  | 4.65E-03 | 2.23E-01 | 3.16E-01 | 4  | 32 | 2.59E-03 |
| Aquaporin-mediated transport                                      | 1 | 53  | 4.65E-03 | 2.23E-01 | 3.16E-01 | 3  | 25 | 2.02E-03 |
| G-protein mediated events                                         | 1 | 54  | 4.74E-03 | 2.26E-01 | 3.16E-01 | 4  | 41 | 3.31E-03 |

|                                                                       |   |     |          |          |          |    |     |          |
|-----------------------------------------------------------------------|---|-----|----------|----------|----------|----|-----|----------|
| Ion homeostasis                                                       | 1 | 54  | 4.74E-03 | 2.26E-01 | 3.16E-01 | 1  | 15  | 1.21E-03 |
| NRAGE signals death through JNK                                       | 1 | 59  | 5.18E-03 | 2.44E-01 | 3.16E-01 | 1  | 7   | 5.66E-04 |
| GLI3 is processed to GLI3R by the proteasome                          | 1 | 60  | 5.27E-03 | 2.48E-01 | 3.16E-01 | 1  | 5   | 4.04E-04 |
| Degradation of GLI2 by the proteasome                                 | 1 | 60  | 5.27E-03 | 2.48E-01 | 3.16E-01 | 1  | 5   | 4.04E-04 |
| Degradation of GLI1 by the proteasome                                 | 1 | 60  | 5.27E-03 | 2.48E-01 | 3.16E-01 | 1  | 6   | 4.85E-04 |
| Signaling by BRAF and RAF fusions                                     | 1 | 66  | 5.79E-03 | 2.69E-01 | 3.16E-01 | 4  | 5   | 4.04E-04 |
| Plasma lipoprotein assembly, remodeling, and clearance                | 1 | 72  | 6.32E-03 | 2.90E-01 | 3.16E-01 | 1  | 83  | 6.71E-03 |
| Oncogenic MAPK signaling                                              | 1 | 74  | 6.49E-03 | 2.97E-01 | 3.16E-01 | 20 | 34  | 2.75E-03 |
| Cell death signalling via NRAGE, NRIF and NADE                        | 1 | 76  | 6.67E-03 | 3.03E-01 | 3.16E-01 | 1  | 17  | 1.37E-03 |
| Glycolysis                                                            | 1 | 78  | 6.85E-03 | 3.10E-01 | 3.16E-01 | 1  | 24  | 1.94E-03 |
| Regulation of insulin secretion                                       | 1 | 79  | 6.93E-03 | 3.13E-01 | 3.16E-01 | 4  | 34  | 2.75E-03 |
| G alpha (12/13) signalling events                                     | 1 | 80  | 7.02E-03 | 3.16E-01 | 3.16E-01 | 1  | 14  | 1.13E-03 |
| Post NMDA receptor activation events                                  | 1 | 84  | 7.37E-03 | 3.29E-01 | 3.29E-01 | 4  | 39  | 3.15E-03 |
| Integrin cell surface interactions                                    | 1 | 85  | 7.46E-03 | 3.33E-01 | 3.33E-01 | 2  | 54  | 4.36E-03 |
| SLC-mediated transmembrane transport                                  | 2 | 251 | 2.20E-02 | 3.34E-01 | 3.34E-01 | 2  | 190 | 1.54E-02 |
| MAPK6/MAPK4 signaling                                                 | 1 | 89  | 7.81E-03 | 3.45E-01 | 3.45E-01 | 1  | 40  | 3.23E-03 |
| Opioid Signalling                                                     | 1 | 90  | 7.90E-03 | 3.48E-01 | 3.48E-01 | 6  | 59  | 4.77E-03 |
| Activation of NMDA receptors and postsynaptic events                  | 1 | 97  | 8.51E-03 | 3.70E-01 | 3.70E-01 | 4  | 71  | 5.74E-03 |
| Transmission across Chemical Synapses                                 | 2 | 273 | 2.40E-02 | 3.72E-01 | 3.72E-01 | 8  | 156 | 1.26E-02 |
| Glucose metabolism                                                    | 1 | 98  | 8.60E-03 | 3.73E-01 | 3.73E-01 | 1  | 49  | 3.96E-03 |
| VEGFA-VEGFR2 Pathway                                                  | 1 | 98  | 8.60E-03 | 3.73E-01 | 3.73E-01 | 1  | 77  | 6.22E-03 |
| p75 NTR receptor-mediated signalling                                  | 1 | 99  | 8.69E-03 | 3.76E-01 | 3.76E-01 | 1  | 50  | 4.04E-03 |
| Stimuli-sensing channels                                              | 1 | 107 | 9.39E-03 | 3.99E-01 | 3.99E-01 | 1  | 26  | 2.10E-03 |
| Signaling by VEGF                                                     | 1 | 108 | 9.48E-03 | 4.02E-01 | 4.02E-01 | 1  | 84  | 6.79E-03 |
| Integration of energy metabolism                                      | 1 | 109 | 9.57E-03 | 4.05E-01 | 4.05E-01 | 8  | 62  | 5.01E-03 |
| Hedgehog 'off' state                                                  | 1 | 114 | 1.00E-02 | 4.19E-01 | 4.19E-01 | 4  | 32  | 2.59E-03 |
| MAPK family signaling cascades                                        | 2 | 306 | 2.69E-02 | 4.27E-01 | 4.27E-01 | 5  | 86  | 6.95E-03 |
| FCGR3A-mediated IL10 synthesis                                        | 1 | 128 | 1.12E-02 | 4.57E-01 | 4.57E-01 | 4  | 20  | 1.62E-03 |
| Platelet degranulation                                                | 1 | 128 | 1.12E-02 | 4.57E-01 | 4.57E-01 | 1  | 11  | 8.89E-04 |
| Transport of small molecules                                          | 4 | 731 | 6.42E-02 | 4.59E-01 | 4.59E-01 | 7  | 436 | 3.52E-02 |
| Response to elevated platelet cytosolic Ca2+                          | 1 | 133 | 1.17E-02 | 4.70E-01 | 4.70E-01 | 1  | 14  | 1.13E-03 |
| ADORA2B mediated anti-inflammatory cytokines production               | 1 | 136 | 1.19E-02 | 4.77E-01 | 4.77E-01 | 4  | 12  | 9.70E-04 |
| Cardiac conduction                                                    | 1 | 138 | 1.21E-02 | 4.82E-01 | 4.82E-01 | 1  | 26  | 2.10E-03 |
| Rho GTPase cycle                                                      | 1 | 141 | 1.24E-02 | 4.90E-01 | 4.90E-01 | 1  | 5   | 4.04E-04 |
| Death Receptor Signalling                                             | 1 | 147 | 1.29E-02 | 5.04E-01 | 5.04E-01 | 1  | 90  | 7.27E-03 |
| Signaling by Hedgehog                                                 | 1 | 150 | 1.32E-02 | 5.11E-01 | 5.11E-01 | 4  | 82  | 6.63E-03 |
| Factors involved in megakaryocyte development and platelet production | 1 | 160 | 1.40E-02 | 5.34E-01 | 5.34E-01 | 1  | 43  | 3.48E-03 |
| C-type lectin receptors (CLRs)                                        | 1 | 174 | 1.53E-02 | 5.64E-01 | 5.64E-01 | 1  | 68  | 5.50E-03 |
| Ion channel transport                                                 | 1 | 184 | 1.61E-02 | 5.85E-01 | 5.85E-01 | 1  | 41  | 3.31E-03 |
| Neuronal System                                                       | 2 | 419 | 3.68E-02 | 5.95E-01 | 5.95E-01 | 8  | 209 | 1.69E-02 |
| Muscle contraction                                                    | 1 | 207 | 1.82E-02 | 6.28E-01 | 6.28E-01 | 1  | 41  | 3.31E-03 |
| Neurotransmitter receptors and postsynaptic signal transmission       | 1 | 208 | 1.83E-02 | 6.30E-01 | 6.30E-01 | 4  | 109 | 8.81E-03 |
| Signaling by ROBO receptors                                           | 1 | 218 | 1.91E-02 | 6.48E-01 | 6.48E-01 | 1  | 59  | 4.77E-03 |
| Leishmania parasite growth and survival                               | 1 | 259 | 2.27E-02 | 7.11E-01 | 7.11E-01 | 4  | 40  | 3.23E-03 |

|          |                                                                                                                     |    |      |          |          |          |    |      |          |
|----------|---------------------------------------------------------------------------------------------------------------------|----|------|----------|----------|----------|----|------|----------|
|          | Anti-inflammatory response favouring Leishmania parasite infection                                                  | 1  | 259  | 2.27E-02 | 7.11E-01 | 7.11E-01 | 4  | 40   | 3.23E-03 |
|          | RAF/MAP kinase cascade                                                                                              | 1  | 260  | 2.28E-02 | 7.12E-01 | 7.12E-01 | 4  | 39   | 3.15E-03 |
|          | Platelet activation, signaling and aggregation                                                                      | 1  | 265  | 2.33E-02 | 7.19E-01 | 7.19E-01 | 22 | 115  | 9.30E-03 |
|          | MAPK1/MAPK3 signaling                                                                                               | 1  | 267  | 2.34E-02 | 7.22E-01 | 7.22E-01 | 4  | 46   | 3.72E-03 |
|          | FLT3 Signaling                                                                                                      | 1  | 278  | 2.44E-02 | 7.37E-01 | 7.37E-01 | 4  | 61   | 4.93E-03 |
|          | Metabolism of carbohydrates                                                                                         | 1  | 300  | 2.63E-02 | 7.63E-01 | 7.63E-01 | 1  | 236  | 1.91E-02 |
|          | Extracellular matrix organization                                                                                   | 1  | 301  | 2.64E-02 | 7.64E-01 | 7.64E-01 | 2  | 318  | 2.57E-02 |
|          | Intracellular signaling by second messengers                                                                        | 1  | 316  | 2.77E-02 | 7.81E-01 | 7.81E-01 | 4  | 114  | 9.21E-03 |
|          | Leishmania infection                                                                                                | 1  | 343  | 3.01E-02 | 8.08E-01 | 8.08E-01 | 4  | 95   | 7.68E-03 |
|          | Diseases of signal transduction by growth factor receptors and second messengers                                    | 1  | 393  | 3.45E-02 | 8.50E-01 | 8.50E-01 | 20 | 356  | 2.88E-02 |
|          | G alpha (i) signalling events                                                                                       | 1  | 408  | 3.58E-02 | 8.60E-01 | 8.60E-01 | 6  | 155  | 1.25E-02 |
|          | Hemostasis                                                                                                          | 2  | 726  | 6.37E-02 | 8.66E-01 | 8.66E-01 | 27 | 328  | 2.65E-02 |
|          | Signaling by Rho GTPases                                                                                            | 1  | 426  | 3.74E-02 | 8.72E-01 | 8.72E-01 | 1  | 117  | 9.46E-03 |
|          | Olfactory Signaling Pathway                                                                                         | 1  | 432  | 3.79E-02 | 8.76E-01 | 8.76E-01 | 1  | 2    | 1.62E-04 |
|          | GPCR downstream signalling                                                                                          | 3  | 1154 | 1.01E-01 | 9.21E-01 | 9.21E-01 | 8  | 248  | 2.00E-02 |
|          | Signaling by Receptor Tyrosine Kinases                                                                              | 1  | 523  | 4.59E-02 | 9.21E-01 | 9.21E-01 | 1  | 698  | 5.64E-02 |
|          | Axon guidance                                                                                                       | 1  | 558  | 4.90E-02 | 9.34E-01 | 9.34E-01 | 2  | 296  | 2.39E-02 |
|          | Signaling by GPCR                                                                                                   | 3  | 1226 | 1.08E-01 | 9.39E-01 | 9.39E-01 | 8  | 427  | 3.45E-02 |
|          | G alpha (s) signalling events                                                                                       | 1  | 577  | 5.06E-02 | 9.40E-01 | 9.40E-01 | 1  | 18   | 1.45E-03 |
|          | Nervous system development                                                                                          | 1  | 584  | 5.13E-02 | 9.42E-01 | 9.42E-01 | 2  | 322  | 2.60E-02 |
|          | Post-translational protein modification                                                                             | 3  | 1417 | 1.24E-01 | 9.71E-01 | 9.71E-01 | 2  | 513  | 4.15E-02 |
|          | Metabolism of lipids                                                                                                | 1  | 748  | 6.56E-02 | 9.74E-01 | 9.74E-01 | 2  | 814  | 6.58E-02 |
|          | Adaptive Immune System                                                                                              | 1  | 944  | 8.29E-02 | 9.91E-01 | 9.91E-01 | 1  | 260  | 2.10E-02 |
|          | Cytokine Signaling in Immune system                                                                                 | 1  | 954  | 8.37E-02 | 9.91E-01 | 9.91E-01 | 4  | 699  | 5.65E-02 |
|          | Infectious disease                                                                                                  | 1  | 1040 | 9.13E-02 | 9.94E-01 | 9.94E-01 | 4  | 485  | 3.92E-02 |
|          | Developmental Biology                                                                                               | 1  | 1100 | 9.65E-02 | 9.96E-01 | 9.96E-01 | 2  | 536  | 4.33E-02 |
|          | Innate Immune System                                                                                                | 1  | 1187 | 1.04E-01 | 9.97E-01 | 9.97E-01 | 1  | 662  | 5.35E-02 |
|          | Metabolism of proteins                                                                                              | 3  | 2012 | 1.77E-01 | 9.98E-01 | 9.98E-01 | 2  | 874  | 7.06E-02 |
|          | Disease                                                                                                             | 2  | 1735 | 1.52E-01 | 9.99E-01 | 9.99E-01 | 24 | 1201 | 9.71E-02 |
|          | Signal Transduction                                                                                                 | 4  | 2829 | 2.48E-01 | 1.00E+00 | 1.00E+00 | 35 | 2333 | 1.89E-01 |
|          | Immune System                                                                                                       | 2  | 2374 | 2.08E-01 | 1.00E+00 | 1.00E+00 | 6  | 1562 | 1.26E-01 |
|          | Metabolism                                                                                                          | 1  | 2142 | 1.88E-01 | 1.00E+00 | 1.00E+00 | 10 | 2001 | 1.62E-01 |
|          | Ub-specific processing proteases                                                                                    | 2  | 205  | 1.80E-02 | 2.21E-02 | 7.97E-02 | 2  | 40   | 3.23E-03 |
|          | Deubiquitination                                                                                                    | 2  | 282  | 2.47E-02 | 3.99E-02 | 7.97E-02 | 2  | 77   | 6.22E-03 |
|          | Post-translational protein modification                                                                             | 2  | 1417 | 1.24E-01 | 4.94E-01 | 4.94E-01 | 2  | 513  | 4.15E-02 |
| Cluster4 | Metabolism of proteins                                                                                              | 2  | 2012 | 1.77E-01 | 6.97E-01 | 6.97E-01 | 2  | 874  | 7.06E-02 |
|          | Respiratory electron transport                                                                                      | 8  | 115  | 7.92E-03 | 9.51E-14 | 4.66E-12 | 8  | 19   | 1.50E-03 |
|          | Respiratory electron transport, ATP synthesis by chemiosmotic coupling, and heat production by uncoupling proteins. | 8  | 150  | 1.03E-02 | 7.85E-13 | 1.88E-11 | 8  | 31   | 2.44E-03 |
|          | The citric acid (TCA) cycle and respiratory electron transport                                                      | 8  | 233  | 1.61E-02 | 2.57E-11 | 4.11E-10 | 8  | 67   | 5.28E-03 |
|          | Complex I biogenesis                                                                                                | 5  | 57   | 3.93E-03 | 2.71E-09 | 3.26E-08 | 6  | 13   | 1.02E-03 |
|          | TP53 Regulates Metabolic Genes                                                                                      | 3  | 125  | 8.61E-03 | 2.69E-04 | 2.42E-03 | 1  | 34   | 2.68E-03 |
|          | Metabolism                                                                                                          | 10 | 3650 | 2.51E-01 | 8.36E-04 | 6.69E-03 | 23 | 2241 | 1.76E-01 |
| Cluster5 | Synthesis of Prostaglandins (PG) and Thromboxanes (TX)                                                              | 2  | 58   | 4.00E-03 | 1.62E-03 | 1.13E-02 | 7  | 32   | 2.52E-03 |

|                                                                    |   |      |          |          |          |    |      |          |
|--------------------------------------------------------------------|---|------|----------|----------|----------|----|------|----------|
| Interleukin-10 signaling                                           | 2 | 86   | 5.93E-03 | 3.50E-03 | 2.10E-02 | 1  | 15   | 1.18E-03 |
| COX reactions                                                      | 1 | 9    | 6.20E-04 | 9.26E-03 | 4.63E-02 | 2  | 2    | 1.57E-04 |
| Arachidonic acid metabolism                                        | 2 | 166  | 1.14E-02 | 1.24E-02 | 4.98E-02 | 8  | 77   | 6.06E-03 |
| Transcriptional Regulation by TP53                                 | 3 | 486  | 3.35E-02 | 1.26E-02 | 5.05E-02 | 1  | 259  | 2.04E-02 |
| Interleukin-4 and Interleukin-13 signaling                         | 2 | 211  | 1.45E-02 | 1.96E-02 | 6.70E-02 | 1  | 46   | 3.62E-03 |
| Synthesis of 15-eicosatetraenoic acid derivatives                  | 1 | 22   | 1.52E-03 | 2.25E-02 | 6.70E-02 | 1  | 4    | 3.15E-04 |
| RNA Polymerase II Transcription                                    | 5 | 1692 | 1.17E-01 | 2.36E-02 | 6.70E-02 | 13 | 885  | 6.97E-02 |
| Biosynthesis of electrophilic 蠟-3 PUFA oxo-derivatives             | 1 | 29   | 2.00E-03 | 2.96E-02 | 6.70E-02 | 4  | 20   | 1.57E-03 |
| Biosynthesis of DPA-n-3 SPMs                                       | 1 | 31   | 2.14E-03 | 3.16E-02 | 6.70E-02 | 1  | 18   | 1.42E-03 |
| Gene expression (Transcription)                                    | 5 | 1850 | 1.27E-01 | 3.35E-02 | 6.70E-02 | 13 | 996  | 7.84E-02 |
| Biosynthesis of EPA-derived SPMs                                   | 1 | 33   | 2.27E-03 | 3.36E-02 | 6.71E-02 | 1  | 17   | 1.34E-03 |
| Glucagon-type ligand receptors                                     | 1 | 35   | 2.41E-03 | 3.56E-02 | 7.11E-02 | 1  | 8    | 6.30E-04 |
| Biosynthesis of DPA-derived SPMs                                   | 1 | 35   | 2.41E-03 | 3.56E-02 | 7.11E-02 | 1  | 21   | 1.65E-03 |
| Nicotinamide salvaging                                             | 1 | 59   | 4.07E-03 | 5.93E-02 | 7.11E-02 | 1  | 12   | 9.45E-04 |
| Formation of RNA Pol II elongation complex                         | 1 | 63   | 4.34E-03 | 6.32E-02 | 7.11E-02 | 2  | 2    | 1.57E-04 |
| RNA Polymerase II Transcription Elongation                         | 1 | 66   | 4.55E-03 | 6.61E-02 | 7.11E-02 | 5  | 8    | 6.30E-04 |
| Generic Transcription Pathway                                      | 4 | 1553 | 1.07E-01 | 6.83E-02 | 7.11E-02 | 2  | 824  | 6.49E-02 |
| Fatty acid metabolism                                              | 2 | 429  | 2.96E-02 | 7.11E-02 | 7.11E-02 | 8  | 217  | 1.71E-02 |
| Nicotinate metabolism                                              | 1 | 84   | 5.79E-03 | 8.34E-02 | 8.34E-02 | 1  | 29   | 2.28E-03 |
| RNA Polymerase II Pre-transcription Events                         | 1 | 88   | 6.06E-03 | 8.72E-02 | 8.72E-02 | 6  | 17   | 1.34E-03 |
| Biosynthesis of DHA-derived SPMs                                   | 1 | 89   | 6.13E-03 | 8.81E-02 | 8.81E-02 | 1  | 58   | 4.57E-03 |
| Class B/2 (Secretin family receptors)                              | 1 | 99   | 6.82E-03 | 9.76E-02 | 9.76E-02 | 1  | 20   | 1.57E-03 |
| Signaling by Interleukins                                          | 2 | 639  | 4.40E-02 | 1.39E-01 | 1.39E-01 | 1  | 490  | 3.86E-02 |
| ADORA2B mediated anti-inflammatory cytokines production            | 1 | 159  | 1.10E-02 | 1.52E-01 | 1.52E-01 | 1  | 12   | 9.45E-04 |
| Biosynthesis of specialized proresolving mediators (SPMs)          | 1 | 159  | 1.10E-02 | 1.52E-01 | 1.52E-01 | 7  | 124  | 9.76E-03 |
| Metabolism of water-soluble vitamins and cofactors                 | 1 | 254  | 1.75E-02 | 2.33E-01 | 2.33E-01 | 1  | 144  | 1.13E-02 |
| Leishmania parasite growth and survival                            | 1 | 297  | 2.05E-02 | 2.67E-01 | 2.67E-01 | 1  | 40   | 3.15E-03 |
| Anti-inflammatory response favouring Leishmania parasite infection | 1 | 297  | 2.05E-02 | 2.67E-01 | 2.67E-01 | 1  | 40   | 3.15E-03 |
| Phase I - Functionalization of compounds                           | 1 | 298  | 2.05E-02 | 2.67E-01 | 2.67E-01 | 2  | 98   | 7.72E-03 |
| Metabolism of vitamins and cofactors                               | 1 | 382  | 2.63E-02 | 3.30E-01 | 3.30E-01 | 1  | 205  | 1.61E-02 |
| Leishmania infection                                               | 1 | 403  | 2.78E-02 | 3.45E-01 | 3.45E-01 | 1  | 95   | 7.48E-03 |
| Cytokine Signaling in Immune system                                | 2 | 1261 | 8.69E-02 | 3.79E-01 | 3.79E-01 | 1  | 699  | 5.50E-02 |
| Biological oxidations                                              | 1 | 545  | 3.75E-02 | 4.37E-01 | 4.37E-01 | 2  | 188  | 1.48E-02 |
| Metabolism of lipids                                               | 2 | 1445 | 9.96E-02 | 4.49E-01 | 4.49E-01 | 15 | 943  | 7.43E-02 |
| G alpha (s) signalling events                                      | 1 | 605  | 4.17E-02 | 4.72E-01 | 4.72E-01 | 3  | 18   | 1.42E-03 |
| GPCR ligand binding                                                | 1 | 652  | 4.49E-02 | 4.98E-01 | 4.98E-01 | 1  | 179  | 1.41E-02 |
| Infectious disease                                                 | 1 | 1174 | 8.09E-02 | 7.18E-01 | 7.18E-01 | 1  | 494  | 3.89E-02 |
| GPCR downstream signalling                                         | 1 | 1359 | 9.36E-02 | 7.71E-01 | 7.71E-01 | 3  | 258  | 2.03E-02 |
| Signaling by GPCR                                                  | 1 | 1485 | 1.02E-01 | 8.02E-01 | 8.02E-01 | 4  | 437  | 3.44E-02 |
| Immune System                                                      | 2 | 2823 | 1.95E-01 | 8.20E-01 | 8.20E-01 | 1  | 1598 | 1.26E-01 |
| Disease                                                            | 1 | 2171 | 1.50E-01 | 9.12E-01 | 9.12E-01 | 1  | 1216 | 9.57E-02 |
| Signal Transduction                                                | 1 | 3364 | 2.32E-01 | 9.81E-01 | 9.81E-01 | 4  | 2347 | 1.85E-01 |
| Ub-specific processing proteases                                   | 1 | 205  | 1.80E-02 | 1.96E-01 | 5.19E-01 | 2  | 40   | 3.23E-03 |
| Cluster6 Deubiquitination                                          | 1 | 282  | 2.47E-02 | 2.60E-01 | 5.19E-01 | 2  | 77   | 6.22E-03 |



|                                         |   |      |          |          |          |   |     |          |
|-----------------------------------------|---|------|----------|----------|----------|---|-----|----------|
| Post-translational protein modification | 1 | 1417 | 1.24E-01 | 7.97E-01 | 7.97E-01 | 2 | 513 | 4.15E-02 |
| Metabolism of proteins                  | 1 | 2012 | 1.77E-01 | 9.03E-01 | 9.03E-01 | 2 | 874 | 7.06E-02 |

---

\*1. cluster 1 did not have any entities output

## References

1. World Health Organization (WHO), Laboratory biosafety guidance related to coronavirus disease 2019 (COVID-19): interim guidance, 12 February 2020 (<https://apps.who.int/iris/bitstream/handle/10665/331138/WHO-WPE-GIH-2020.1-eng.pdf>).
2. Y. Chen, Y. Chen, C. Shi, Z. Huang, Y. Zhang, S. Li, Y. Li, J. Ye, C. Yu, Z. Li, X. Zhang, J. Wang, H. Yang, L. Fang, Q. Chen, SOAPnuke: a MapReduce acceleration-supported software for integrated quality control and preprocessing of high-throughput sequencing data. *Gigascience*. **7**(1), 1-6 (2018).
3. H. Li, R. Durbin, Fast and accurate short read alignment with Burrows-Wheeler transform. *Bioinformatics*. **25**(14), 1754-60 (2009).
4. A. McKenna, M. Hanna, E. Banks, A. Sivachenko, K. Cibulskis, A. Kernytsky, K. Garimella, D. Altshuler, S. Gabriel, M. Daly, M.A. DePristo, The Genome Analysis Toolkit: a MapReduce framework for analyzing next-generation DNA sequencing data. *Genome. Res.* **20**(9),1297-303 (2010).
5. K.I. Kendig, S. Baheti, M.A. Bockol, T.M. Drucker, S.N. Hart, J.R. Heldenbrand, M. Hernaez, M.E. Hudson, M.T. Kalmbach, E.W. Klee, N.R. Mattson, C.A. Ross, M. Taschuk, E.D. Wieben, M. Wiewert, D.E. Wildman, L.S. Mainzer, Sentieon DNaseq variant calling workflow demonstrates strong computational performance and accuracy. *Front. Genet.* **10**,736 (2019).
6. A. Fabregat, S. Jupe, L. Matthews, K. Sidiropoulos, M. Gillespie, P. Garapati, R. Haw, B. Jassal, F. Korninger, B. May, M. Milacic, C.D. Roca, K. Rothfels, C. Sevilla, V. Shamovsky, S. Shorser, T. Varusai, G. Viteri, J. Weiser, G. Wu, L. Stein, H. Hermjakob, P. D'Eustachio, The Reactome Pathway Knowledgebase. *Nucleic Acids Res.* **46**(D1), D649-D655 (2018).
7. B. Wilkinson, A statistical consideration in psychological research. *Psychol. Bull.* **48**(3), 156-8 (1951).
8. R. Y. Yang *et al.*, <https://www.biorxiv.org/content/10.1101/311563v1.article-info> (2020).
9. GTEx Consortium, The Genotype-Tissue Expression (GTEx) project. *Nat. Genet.* **45**, 580–585 (2013).
10. Q. Miao, Y. Ma, Q. Wang, J. Pan, Y. Zhang, W. Jin, Y. Yao, Y. Su, Y. Huang, M. Wang, et al. Microbiological diagnostic performance of metagenomic next-generation sequencing when applied to clinical practice. *Clin. Infect. Dis.* **67**, S231-S240 (2018).
11. R. Schlaberg, C.Y. Chiu, S. Miller, G.W. Procop, G. Weinstock, Validation of metagenomic Next-Generation sequencing tests for universal pathogen detection. *Arch. Pathol. Lab. Med.* **141**, 776-786 (2017).
12. C. Langelier, M.S. Zinter, K. Kalantar, G.A. Yanik, S. Christenson, B. O'Donovan, C. White, M. Wilson, A. Sapru, C. C. Dvorak, S. Miller, C. Y. Chiu, J. L. DeRisi, Metagenomic sequencing detects respiratory pathogens in hematopoietic cellular transplant patients. *Am. J. Respir. Crit. Care. Med.* **197**, 524-528 (2018).
